# Supplementary material for: Automated diagnosis of autism with artificial intelligence: State of the art
Source: publisher site journal article supplement (doi:10.1515/revneuro-2023-0050), 2023-09-07
Supplement: Supplementary file 2 [file j_revneuro-2023-0050_suppl_002.docx]

**Automated recognition and diagnosis of autism: state of the art**

Amir Valizadeh 1, thisisamirv@gmail.com, ORCID: 0000-0001-5983-8527

Mana Moassefi 1, Moassefi@gmail.com, ORCID: 0000-0002-0111-7791

Amin Nakhostin-Ansari 2, a-nansari@alumnus.tums.ac.ir, ORCID: 0000-0002-1113-9257

Soheil Heidari Some’eh 2,3, S-heidari@student.tums.ac.ir, ORCID: 0000-0002-2339-1070

Hossein Hosseini-Asl 2,3, hoseinihocein@gmail.com, ORCID: 0000-0003-2753-8719

Mehrnush Saghab Torbati 4, M.storbati@yahoo.com, ORCID: 0000-0003-2524-9315

Reyhaneh Aghajani 2,3, Reyhaneh.aghajani1376@gmail.com, ORCID: 0000-0001-6294-6799

Zahra Maleki Ghorbani 2,3, Malmandi25@gmail.com, ORCID: 0000-0001-8458-2375

Iman Menbari-Oskouie 2, imanmenbary@gmail.com, ORCID: 0000-0002-5511-1512

Faezeh Aghajani 2,5, faezehaghajani.fa@gmail.com, ORCID: 0000-0002-9019-3904

Alireza Mirzamohamadi 2,3, Alimirzareza@gmail.com, ORCID: 0000-0002-6355-9851

Mohammad Ghafouri 2, mohammadghafouri1372@gmail.com, ORCID: 0000-0003-3363-9129

Shahriar Faghani 6,7, Shahriar.faghani@gmail.com, ORCID: 0000-0003-3275-2971

Amir Hossein Memari 2, memari_ah@tums.ac.ir, ORCID: 0000-0002-9639-415X

**Affiliations:**

1. Neuroscience Institute, Tehran University of Medical Sciences, Tehran, Iran, PO: 1419733141

2. Sports Medicine Research Center, Neuroscience Institute, Tehran University of Medical Sciences, Tehran, Iran, PO: 14395578

3. Students' Scientific Research Center, Tehran University of Medical Sciences, Tehran, Iran, PO: 1417755331

4. Islamic Azad University of Zahedan, Zahedan, Iran, PO: 9816743545

5. Research Development Center, Arash Women's Hospital, Tehran University of Medical Sciences, Tehran, Iran, PO: 14695542

6. Shariati Hospital, Department of Radiology, Tehran University of Medical Sciences, Tehran, Iran, PO: 1411713135

7. Interdisciplinary Neuroscience Research Program (INRP), Tehran University of Medical Sciences, Tehran, Iran, PO: 1416634793

**Contact:**

Dr. Amir Hossein Memari

Address: Sports Medicine Research Center, District 6, Gisha Bridge, Jalal-e-Al-e-Ahmad Hwy, No. 7, Tehran, Tehran Province, Iran, PO: 14395578

Phone: 0982188630227; Fax: 0982188003539; Email: memari_ah@tums.ac.ir

# Supplementary Material 2: Characteristics of included studies

| **rs-fMRI** | | | | | | | | | | |
| --- | --- | --- | --- | --- | --- | --- | --- | --- | --- | --- |
| **Parcellation1** | **Feature Selection2** | **ASD/TD** | **Validation** | **Accuracy** | **Sen/Spe** | **Age** | **Classifier3** | **AI Spec4** | **Risk of bias** | **Reference** |
| ROI-based functional connectivity | | | | | | | | | | |
| AAL116 | LLFS | 63/72* | 70:30 | 97.5 | - | B | SVM | RBF kernel | ✓✓✓✓ | (Bi et al. 2018a) |
| Self-generated | t test | 11/48*** | LOOCV | 96.6 | 81.8/100 | A | SVM | Linear kernel | ✓✓✓? | (Emerson et al. 2017) |
| AAL116 | RFE-SSAE | 501/553* | 30-fold | 94.9 | 94/95.6 | B+C | LR | Simple LR | ✕✓✓✓ | (Wang et al. 2019a) |
| RBS | AE | 155/148* | 10-fold | 91.1 | 89.9/92 | B | DRBM | - | ✕✓✓✓ | (Mahmoud and Karamti 2021) |
| Power150 | LLFS | 126/126* | 66:33 | 90.8 | 89/93 | B+C | Ensemble | RF | ✓✓✓✓ | (Chen et al. 2015) |
| Clements35 | RFE | 255/276* | 10-fold | 90.6 | 90.6/90.6 | B+C | SVM | Linear kernel | ✕✓✓✓ | (Wang et al. 2019b) |
| AAL90 | Threshold | 312/328* | 50-fold | 90.3 | 92.3/88.4 | B | DNN | PNN | ✕✓✓✓ | (Iidaka 2015) |
| - | t test-MRMR-LLFS | 23/27* | 5-fold | 89.7 | 87.6/92 | B+C | Ensemble | - | ?✕✕✓ | (Zhang et al. 2021c) |
| AAL90 | SMF-t test | 505/530* | 90:10 | 88 | 91.5/86.5 | B+C | SVM | Linear kernel | ✕✓✕✓ | (Subbaraju et al. 2018) |
| Multi atlas | SLR | 159/197* | 10-fold | 89.1 | 91/87.7 | B | Ensemble | - | ?✓✓✓ | (Huang et al. 2020) |
| AAL116 | None | 55/55* | 5-fold | 86.4 | - | B | AE + Softmax | Stacked SAE | ✕✓✕✓ | (Guo et al. 2017) |
| Multi atlas | L1SCCA | 74/107 | LOOCV | 85 | 80/89 | C | LR | Sparse LR | ✓✓✕✓ | (Yahata et al. 2016) |
| HO110 | None | 186/184* | 5-fold | 84.9 | - | - | FCNN | - | ?✓✓✓ | (Li et al. 2020) |
| Whole brain | AE | 505/530* | 10-fold | 84.1 | 80/75.3 | B+C | CNN | Standard | ✕✓✓✓ | (Sewani and Kashef 2020) |
| Multi atlas | FFS | 505/530* | 10-fold | 83 | 83/84 | B+C | LR | Simple LR | ✕✓✓✓ | (Khan et al. 2020) |
| Multi atlas | SLR | 36/46* | 10-fold | 81.7 | 71.8/89.5 | B+C | SVM | Linear kernel | ?✕✕✓ | (Huang et al. 2019a) |
| AAL116 | t test | 45/47* | LOOCV | 81.5 | 84.4/78.7 | B | SVM | Linear kernel | ✕✓✓✓ | (Li et al. 2017a) |
| AAL90 | Threshold | 443/435* | 90:10 | 81.1 | 80.4/81.7 | B+C | SVM | Gaussian kernel | ✕✓✓✓ | (Mahanand et al. 2016) |
| AAL116 | F score | 23/15* | 62:38 | 80.8 | - | - | SVM | Linear kernel | ?✓?✓ | (K and Murthy Oruganti 2021) |
| DOS160 | Extra tree | 403/468* | 10-fold | 80.5 | 63.7/100 | B+C | SVM | Linear kernel | ✕✓✓✓ | (Benabdallah et al. 2021) |
| AAL116 | LASSO | 539/573* | 85:15 | 79.6 | 83.6/75.6 | B+C | Ensemble | - | ✕✕✓✓ | (Dai et al. 2021) |
| AAL116 | LLFS-t test-RFE | 45/47* | LOOCV | 79.4 | 82.2/76.6 | B | SVM | Multi kernel | ✓✓✓✓ | (Huang et al. 2019b) |
| CC400 | None | 505/530* | 80:20 | 79.2 | 69.6/85 | B+C | CNN | AlexNet | ✕✓✓✓ | (Boppana et al. 2021) |
| Self-generated | F score | 112/128* | LOOCV | 79.2 | 77.8/80.5 | B | SVM | Linear kernel | ✕✓✓✓ | (Chen et al. 2016) |
| Power150 | Threshold | 403/468* | 10-fold | 79.2 | - | B+C | AE + Softmax | - | ✕✕✓✓ | (Yin et al. 2021) |
| DES162 | RFE | 59/59 | 10-fold | 79.1 | 73.3/85 | C | LR | Simple LR | ✓✓✕✓ | (Plitt et al. 2015) |
| Whole brain | t test | 40/40 | LOOCV | 79 | 83/75 | B+C | LR | Simple LR | ✓✓✓✓ | (Anderson et al. 2011) |
| AAL90 | SMF | 505/530* | LOOCV | 77.3 | - | B+C | SVM | Gaussian kernel | ✕✓✕✓ | (Subbaraju et al. 2017) |
| DK70 | t test-RFE | 86/125* | 10-fold | 76.3 | 79.2/63.9 | B | SVM | Linear kernel | ?✕✓✓ | (Jung et al. 2019) |
| RBS | None | 505/530* | 70:30 | 76 | 78/67 | B+C | AE + Softmax | Stacked SAE | ✕✓✓✓ | (Mahmoud et al. 2020) |
| CC400 | None | 505/530* | 10-fold | 76 | 70/81.7 | B+C | CNN | Self-proposed | ✕✓✓✓ | (Shrivastava et al. 2020) |
| CC400 | None | 505/530* | 5-fold | 75.3 | 74/76.6 | B+C | FCNN | - | ✕✓✓✓ | (Yang et al. 2020) |
| SBC36 | LASSO | 15/45 | LOOCV | 75 | 76.7/73.3 | C | LR | Sparse LR | ✓✓✓✓ | (Yamagata et al. 2019) |
| Multi atlas | None | 419/530* | 10-fold | 74.5 | 80.7/66.7 | B+C | AE + Softmax | Stacked DAE | ✕✓✓✓ | (Wang et al. 2020) |
| AAL116 | None | 505/530* | 90:10 | 74 | 94.9/69.9 | B+C | CNN | ResNet-18 + FCNN | ✕✓✓✓ | (Tang et al. 2020) |
| Multi atlas | None | 300/300* | 5-fold | 72.5 | 71.7/73.3 | B | Ensemble | CRF + CNN | ✕✓✓✓ | (Agastinose Ronicko et al. 2020) |
| CC400 | None | 505/530* | 5-fold | 72 | 70.9/73 | B+C | LR | Ridge LR | ✕✓✓✓ | (Yang et al. 2019) |
| CC200 | None | 505/530* | 10-fold | 71 | 73/66 | B+C | DNN | CapsNet | ✕?✓✓ | (Jiao et al. 2020) |
| HO110 | Threshold | 102/88* | LOOCV | 71 | 69/74 | B | SVM | Linear kernel | ✕✓✕✓ | (Spera et al. 2019) |
| CC200 | None | 505/530* | 10-fold | 71 | 71/71 | B+C | CNN | Self-proposed | ✕✓✓✓ | (Zhuang et al. 2019) |
| Power150 | LEAN-LLFS | 387/436* | 5-fold | 70.9 | - | B+C | FCNN | - | ✕✓✓✓ | (Gupta et al. 2021) |
| CC200 | F score | 505/530* | 5-fold | 70.9 | 70.7/75.5 | B+C | AE + Softmax | - | ✕✓✓✓ | (Zhang et al. 2022) |
| CC200 | None | 505/530* | 10-fold | 70.8 | 62.2/79.1 | B+C | AE + Softmax | Stacked SAE | ✕✓✓✓ | (Almuqhim and Saeed 2021) |
| Power150 | None | 126/126* | 72:28 | 70.8 | - | B+C | Ensemble | CRF | ✕✓✓✓ | (Jahedi et al. 2017) |
| CC200 | RFE | 442/556* | 80:20 | 70.7 | - | B+C | SVM | RBF kernel | ✕✓✓✓ | (Lanka et al. 2020) |
| DLA200 | SLR | 100/100* | 10-fold | 70.5 | 74/67 | B+C | CNN | Standard | ?✕✓✓ | (Zhao et al. 2018b) |
| AAL90 | None | 38/23* | 5-fold | 70.4 | 72.5/67 | B+C | AE + Softmax | Stacked SAE | ✓✓✕✓ | (Li et al. 2018b) |
| CC200 | None | 505/530* | 5-fold | 70.3 | 68.3/72.2 | B+C | AE + Softmax | - | ✕✓✓✓ | (Eslami et al. 2019) |
| CC400 | None | 505/530* | 10-fold | 70.2 | 77.5/61.8 | B+C | CNN | Standard | ✕✓✓✓ | (Sherkatghanad et al. 2019) |
| CC200 | RFE | 432/556* | 90:10 | 70.1 | - | B+C | SVM | Linear kernel | ✕✓✓✓ | (Chaitra et al. 2020) |
| CC200 | None | 505/530* | 10-fold | 70 | 74/63 | B+C | AE + Softmax | Stacked DAE | ✕✓✓✓ | (Heinsfeld et al. 2018) |
| Brodmann’s areas | Elastic Nets | 167/205* | 10-fold | 70 | 65/75 | B | SVM | Linear kernel | ✕✓✓✓ | (Bhaumik et al. 2018) |
| AAL116 | None | 403/468* | 5-fold | 69.8 | 63.1/75.6 | B+C | FCNN | - | ✕✓✓✓ | (Hu et al. 2020) |
| BASC64 | BOF | 75/100* | 5-fold | 69.7 | 54.6/80.9 | B+C | SVM | RBF kernel | ✕✓✓✓ | (Cancino et al. 2021) |
| AAL116 | Masking | 510/536* | 5-fold | 69.2 | 64.7/73.5 | B+C | AE + Softmax | Stacked SAE | ✕✕?✓ | (Jung et al. 2021) |
| AAL116 | SLR | 250/218* | 5-fold | 69.1 | 70.2/66.4 | B+C | KNN | - | ✕✓✓✓ | (Wang et al. 2018) |
| CC200 | Extra tree | 506/548* | 10-fold | 67.7 | 66.3/68.9 | B+C | SVM | Linear kernel | ✕✓✓✓ | (Liu et al. 2020b) |
| AAL116 | t test | 119/144* | 10-fold | 67.4 | 58.3/75 | B | DRBM | - | ?✕✓✓ | (Kam et al. 2017) |
| HBM-Bzdok12 | IBP | 369/349* | 90:10 | 67.3 | - | B+C | SVM | Linear kernel | ✓✓✓✓ | (Kernbach et al. 2018) |
| DLA39 | MSDL | 403/468* | LOOCV | 67 | 61/72.3 | B+C | SVM | Linear kernel | ✕✓✕✓ | (Abraham et al. 2017) |
| AAL116 | None | 1711/15903 | 70:15:15 | 67 | - | All | Ensemble | - | ✕✕✓✓ | (Leming et al. 2020) |
| HO110 | EIIC | 539/573* | LOOCV | 67 | - | B+C | Ensemble | - | ✕✓✕✓ | (Okamoto and Akama 2021) |
| AAL90 | EW | 527/569* | 5-fold | 66.9 | 66.4/70.4 | B+C | CNN | Self-proposed | ✕✕✓✓ | (Xing et al. 2018) |
| Multi atlas | None | 200/200* | 80:20 | 65 | 65/65 | B+C | Ensemble | CRF | ✕✓✓✓ | (Fredo et al. 2018) |
| AAL116 | LLFS | 272/245* | LOOCV | 65 | - | - | SVM | Linear kernel | ?✓✕✓ | (Mhiri and Rekik 2020) |
| DOS160 | SDAE | 457/483* | 10-fold | 64 | 63.8/64.4 | B+C | SVM | RBF kernel | ✕✕✓✓ | (Xu and Liang 2021) |
| CC200 | Threshold | 77/77* | 10-fold | 63 | 62/64 | C | SVM | Linear kernel | ✓✓✓✓ | (Kassraian-Fard et al. 2016) |
| Power150 | Graph based | 42/37* | LOOCV | 60.7 | - | B | SVM | Gaussian kernel | ?✕✕✓ | (Dodero et al. 2015a) |
| Whole brain | t test | 447/517* | LOOCV | 60 | 62/58 | B+C | LR | Simple LR | ✕✓✕✓ | (Nielsen et al. 2013) |
| ROI-based functional connectivity + Clinical data | | | | | | | | | | |
| Multi atlas | None | 408/401* | 10-fold | 73.2 | 74.5/71.7 | B+C | DNN | DANN | ✕✕✓✓ | (Niu et al. 2020) |
| HO110 | None | 200/200* | 80:20 | 65 | 65/65 | B | Ensemble | CRF | ✓✓✓✓ | (Reiter et al. 2021) |
| Graph metrics | | | | | | | | | | |
| AAL116 | GERSMC | 103/106* | 70:30 | 96.8 | - | B | SVM | RBF kernel | ✓✓✓✓ | (Bi et al. 2019) |
| AAL116 | LLFS | 45/39* | 70:30 | 96.2 | - | B | SVM | RBF kernel | ✓✕✓✓ | (Bi et al. 2018c) |
| AAL90 | LLFS | 50/42* | 80:20 | 95 | - | B | Ensemble | - | ✓✕✓✓ | (Bi et al. 2018b) |
| AAL116 | SSFA | 28/19* | 10-fold | 95 | 97/91 | - | SVM | Gaussian kernel | ✕✓✕✓ | (Kazeminejad and Sotero 2018) |
| DOS160 | Graph based | 12/12 | LOOCV | 91 | - | C | SVM | Linear kernel | ✕✓✓✓ | (Barttfeld et al. 2012) |
| 6 RSN | ICA-Graph based | 103/192* | LOOCV | 88.7 | 77.4/100 | B+C | SVM | RBF kernel | ✓✕✕✓ | (Sun et al. 2021) |
| AAL116 | Graph based | 45/47 | 10-fold | 87.7 | 87.8/87.7 | B | SVM | Linear kernel | ✕✕✕✓ | (Zu et al. 2019) |
| AAL116 | Prim algorithm | 59/46* | 5-fold | 86.7 | 87.5/85.7 | B+C | SVM | RBF kernel | ✓✕✕✓ | (Shi et al. 2020) |
| Power150 | LLFS | 73/88* | 5-fold | 81.2 | - | B | FCNN | - | ✕✓?✓ | (Gupta et al. 2020) |
| HO110 | Graph based | 403/468* | 10-fold | 79.9 | - | B+C | Ensemble | - | ✕✓✓✓ | (Anirudh and Thiagarajan 2019) |
| HO110 | None | 403/468* | 10-fold | 79.5 | 78.3/81.2 | B+C | GNN | GFT + FCNN | ✕✓✓✓ | (Shao et al. 2021) |
| Power150 | Threshold-RFE | 403/468* | 10-fold | 77.7 | - | B+C | LDA | - | ✕✓✓✓ | (Mostafa et al. 2019) |
| HO110 | LLFS | 416/451* | 80:20 | 76.3 | 81/71.3 | B+C | GNN | ID + FCNN | ✕✓✓✓ | (Chen et al. 2021b) |
| Multi atlas | RFE | 419/530* | 10-fold | 75.9 | 79.2/71.5 | B+C | GNN | MT + Ensemble | ✕✓✓✓ | (Wang et al. 2022) |
| AAL116 | Threshold-RFE | 119/116* | LOOCV | 74.9 | 71.2/78 | B+C | LDA | - | ✕✓✕✓ | (Song et al. 2019) |
| HO110 | None | 221/253* | LOOCV | 73.5 | 78.7/71.5 | B+C | GNN | LR-GCN + FCNN | ✕✓✕✓ | (Zhang et al. 2021a) |
| Whole brain | Graph based | 403/468* | 10-fold | 73.1 | 76/69 | B+C | Ensemble | - | ✕✓✓✓ | (Rakhimberdina et al. 2020) |
| HO110 | RFE | 539/573* | 10-fold | 73 | 68.8/76.9 | B+C | GNN | GFT + FCNN | ✕✓✓✓ | (Cao et al. 2021) |
| HO110 | t test-LASSO | 403/468* | 10-fold | 72.4 | 71.2/75 | B+C | DNN | GAT | ✕✓✓✓ | (Yang et al. 2021a) |
| HO110 | RFE-PCA-AE | 403/468* | 10-fold | 70.4 | - | B+C | GNN | GFT + FCNN | ✕✓✓✓ | (Parisot et al. 2018) |
| Power150 | Graph based | 42/37 | 5-fold | 69.8 | - | B | Ensemble | RF | ✓✕✕✓ | (Ataei et al. 2019) |
| HO110 | None | 403/468* | 10-fold | 69.5 | - | B+C | GNN | GFT + FCNN | ✕✓✓✓ | (Parisot et al. 2017) |
| AAL90 | EW | 474/539* | 5-fold | 68.7 | 69.2/68.3 | B+C | CNN | Self-proposed | ✕✓✓✓ | (Brown et al. 2018) |
| Multi atlas | None | 485/544* | 60:10:30 | 67.3 | 70.4/64.2 | B+C | GNN | MT + KNN | ✕✓✓✓ | (Yao et al. 2019) |
| AAL116 | None | 402/464* | 10-fold | 67.2 | 65.9/68.4 | B+C | GNN | hi-GCN + RBF-SVM | ✕✓✓✓ | (Jiang et al. 2020) |
| Whole brain | Graph based-LLFS | 42/37* | LOOCV | 67 | 70/63.9 | B | Ensemble | - | ?✓✕✓ | (Tolan and Isik 2018) |
| AAL116 | Graph based | 29/31* | External | 65.5 | - | C | SVM | Linear kernel | ✓✓?✓ | (Sadeghi et al. 2017) |
| Power150 | Graph based | 42/37* | LOOCV | 63.3 | 73.8/51.4 | - | SVM | Grass kernel | ?✕✕✓ | (Dodero et al. 2015b) |
| HO110 | None | 403/468* | 5-fold | 62.9 | - | B+C | GNN | s-GCN + FCNN | ✕✓✓✓ | (Ktena et al. 2018) |
| CC200 | Graph based | 493/530* | 17-fold | 59.2 | 61.4/57.4 | B+C | FCNN | - | ✕✓✓✓ | (Kazeminejad and Sotero 2020) |
| Graph metrics + Clinical data | | | | | | | | | | |
| BNA246 | Graph based | 270/305* | 5-fold | 74.5 | 63.5/84.3 | B+C | CNN | Self-proposed | ✕✓✓✓ | (Byeon et al. 2020) |
| Multi atlas | None | 539/573* | 90:10 | 70.2 | - | B+C | GNN | GFT + FCNN | ✕✓✓✓ | (Jain 2018) |
| Dynamic functional connectivity | | | | | | | | | | |
| AAL116 | HMM | 47/73* | 10-fold | 90.1 | 85.5/93.2 | B | SVM | Linear kernel | ✕✓✕✓ | (Jun and Suk 2017) |
| Multi-network | Self-proposed | 30/30* | LOOCV | 90 | 87/93 | B | SVM | Multi kernel | ?✓✓✓ | (Price et al. 2014) |
| Whole brain | None | 42/42* | 28-fold | 89.3 | 88.1/83.3 | B | AE + Softmax | SAE | ✕✕✕✓ | (Xiao et al. 2018) |
| TFP-IP | SSFA | 48/51* | 5-fold | 88 | 87/88 | B | KNN | - | ✕✓✕✓ | (Naghashzadeh et al. 2021) |
| AAL116 | WT | 41/41* | 70:15:15 | 85.9 | 79.3/92.6 | - | KNN | - | ?✕?✓ | (Al-Hiyali et al. 2021) |
| AAL116 | t test-LASSO | 45/47* | 6-fold | 83 | 82/84 | B | SVM | Linear kernel | ✓✓✕✓ | (Zhao et al. 2020a) |
| AAL116 | PCA | 49/41* | LOOCV | 78.9 | 85.7/70.7 | B+C | SVM | Linear kernel | ✓✓✓✓ | (Ma et al. 2021) |
| AAL116 | MTFS-EM | 403/468* | 10-fold | 76.8 | 72.5/79.9 | B+C | SVM | Multi kernel | ✕✓✓✓ | (Liu et al. 2020a) |
| CC200 | RFE | 399/472* | 10-fold | 76.6 | 78.6/74.3 | B+C | SVM | Linear kernel | ✕✓✓✓ | (Karampasi et al. 2021) |
| AAL116 | HMM | 121/171* | 10-fold | 75.9 | 83.3/70.6 | B | SVM | Linear kernel | ✕✓✓✓ | (Jun et al. 2019) |
| CC200 | HMM | 145/157* | 10-fold | 74.9 | - | B+C | SVM | Linear kernel | ✓✓✓✓ | (Fan et al. 2020) |
| BASC64 | MSTEPS | 403/468* | 10-fold | 74.7 | 73/76.3 | B+C | LSTM | - | ✕✓✓✓ | (Bayram et al. 2021) |
| CC200 | AE | 322/352* | LOOCV | 74.7 | 73/75 | B+C | LSTM | - | ✕✓✕✓ | (Liu et al. 2021) |
| AAL116 | LLFS | 423/446* | 10-fold | 73.6 | 75/72 | B+C | Ensemble | - | ✕✓?✓ | (Dammu and Bapi 2019) |
| AAL116 | LLFS-LASSO | 45/47* | 10-fold | 71.4 | 60.5/81.6 | B | SVM | RBF kernel | ✓✓✕✓ | (Wee et al. 2016) |
| Whole brain | WT | 210/249* | 10-fold | 70.5 | 67.9/74.2 | B | CNN | Self-proposed | ✕✕✓✓ | (Aghdam et al. 2019) |
| HO110 | LLFS | 539/573* | 80:20 | 69.8 | 77.1/60.6 | B+C | SVM | Polynomial kernel | ✕✓✓✓ | (Savva et al. 2020) |
| CC200 | None | 539/573* | 10-fold | 68.5 | - | B+C | LSTM | - | ✕✓✓✓ | (Dvornek et al. 2017) |
| CC200 | Manual | 147/146* | 5-fold | 61.1 | 61.8/60 | B+C | SVM | Linear kernel | ?✓?✓ | (Tejwani et al. 2017) |
| AAL116 | BS | 25/25 | External | 53 | 50/55 | B | LSTM | - | ✕✓✓✓ | (Schirmer et al. 2021) |
| Multi atlas | ICA-PCA-LLFS | 32/34 | LOOCV | 50 | - | C | LDA | - | ✓✓✓✓ | (Rabany et al. 2019) |
| Effective connectivity | | | | | | | | | | |
| AAL116 | t test | 48/30* | LOOCV | 87 | 80/92 | B+C | SVM | RBF kernel | ✕✓✓✓ | (Huang 2021) |
| HO110 | DR-ICA-t test | 127/135* | LOOCV | 69 | 63.5/74.6 | B+C | LDA | - | ✕✓✕✓ | (Haghighat et al. 2022) |
| 3D fMRI | | | | | | | | | | |
| Whole brain | None | 79/105* | - | 94.7 | 92.5/96.2 | B+C | CNN | DarkNet-19 | ✕✓?✓ | (Ahammed et al. 2021b) |
| Whole brain | BOF | 19/19* | 70:30 | 81 | 79/83 | B | SVM | Linear kernel | ?✓✓✓ | (Ahammed et al. 2021a) |
| Power spectral density | | | | | | | | | | |
| Whole brain | None | 117/81* | LOOCV | 96.2 | 98/93.6 | B | AE + Softmax | SAE | ✕✓✕✓ | (Xiao et al. 2019) |
| Whole brain | AE | 123/160*** | LOOCV | 92 | 93/89 | B | SVM | RBF kernel | ✓✕✕✓ | (Dekhil et al. 2018) |
| Regional homogeneity | | | | | | | | | | |
| AAL116 | Chi square | 443/435* | 75:25 | 68.9 | - | B+C | DNN | PBL-McRBFN | ✕✓✓✓ | (Vigneshwaran et al. 2015) |
| Whole brain | Self-proposed | 539/573* | 5-fold | 62 | - | B+C | SVM | Linear kernel | ✕✕✓✓ | (Rane et al. 2017) |
| High-order functional connectivity | | | | | | | | | | |
| AAL116 | LASSO | 54/46* | 10-fold | 81 | 82/80 | B | SVM | Linear kernel | ✓✓✕✓ | (Zhao et al. 2018a) |
| CC200 | LLFS | 511/561* | 10-fold | 77.3 | 78/77.8 | B+C | DNN | PTN | ✕✓✓✓ | (Liang et al. 2021) |
| AAL116 | t test | 77/105 | 10-fold | 72.6 | 79/64 | B+C | Ensemble | Sparce-MVTC | ✕✓✓✓ | (Wang et al. 2019c) |
| AAL116 | t test | 134/160* | 10-fold | 68.8 | 73.6/62.5 | B+C | Ensemble | Sparce-MVTC | ✕✕✓✓ | (Wang et al. 2017) |
| Wavelet-based dynamics features | | | | | | | | | | |
| HO110 | GARCH-t test | 222/246* | 5-fold | 75.3 | - | - | SVM | Linear kernel | ?✕✓✓ | (Sartipi et al. 2018) |
| 7 RSN | ICA-DR | 24/30 | LOOCV | 86.7 | 91.7/83.3 | B | SVM | Polynomial kernel | ?✓✓✓ | (Bernas et al. 2018) |
| Independent components | | | | | | | | | | |
| Whole brain | ICA | 392/407* | - | 89.5 | 89.3/89.7 | B+C | Ensemble | - | ✕✓?✓ | (Syed et al. 2017) |
| Whole brain | ICA-DR | 20/20*** | LOOCV | 83 | 67/100 | B | LR | Simple LR | ✓✓✓✓ | (Uddin et al. 2013) |
| 8 RSN | LLFS | 79/105* | 10-fold | 77.7 | 78.6/76.9 | B+C | CNN | Standard | ✕✓✓✓ | (Yang et al. 2021b) |
| Histogram of oriented gradients + Characteristics | | | | | | | | | | |
| HO110 | MRMR | 538/573* | 80:20 | 65 | 71.3/58.3 | B+C | SVM | RBF kernel | ✕✓✓✓ | (Ghiassian et al. 2016) |
| ROI-based functional connectivity + Normalized image | | | | | | | | | | |
| Multi atlas | None | 542/625* | 77:33 | 71.7 | - | B+C | CNN | 3D CNN | ✕✓✓✓ | (Khosla et al. 2018) |
| ROI-based functional connectivity + Clinical data + Information theory | | | | | | | | | | |
| CC200 | RFE | 399/472* | 10-fold | 72.5 | 79.2/64.7 | B+C | SVM | Linear kernel | ✕✓✓✓ | (Karampasi et al. 2020) |
| ROI-based functional connectivity + Amplitude of low-frequency fluctuation | | | | | | | | | | |
| AAL90 | None | 99/85* | 10-fold | 68.5 | 69.5/67.6 | B+C | CNN | Standard | ✕✓✓✓ | (You et al. 2020) |
| Topology | | | | | | | | | | |
| CC200 | None | 505/530* | 5-fold | 69.2 | - | B+C | FCNN | - | ✕✓✓✓ | (Rathore et al. 2019) |
| Non-oscillatory connectivity | | | | | | | | | | |
| AAL116 | t test | 36/36* | 10-fold | 80 | 80/80 | B+C | SVM | Polynomial kernel | ✕✕✕✓ | (Sadiq et al. 2022) |
| Combined features | | | | | | | | | | |
| 9 measures | None | 620/542* | 5-fold | 64 | - | B+C | SVM | Linear kernel | ✕✓✓✓ | (Thomas et al. 2020) |
| Normalized image | | | | | | | | | | |
| EPI images | None | 69/69* | 70:15:15 | 98.4 | - | B | CNN | Inception V3 | ✓✕✓✓ | (Herath et al. 2021) |
| Glass brain-Stat_map | LLFS | 529/573* | 85:15 | 82.7 | - | B+C | Ensemble | - | ✕✓✓✓ | (Ahmed et al. 2020) |
| EPI images | None | 74/98* | 70:15:15 | 57.8 | 57.2/61.3 | B+C | CNN | InceptionResNet V2 | ✕✓✓✓ | (Dominic et al. 2021) |
| **DWI/DTI** | | | | | | | | | | |
| **Feature Selection2** | | **ASD/TD** | **Validation** | **Accuracy** | **Sen/Spe** | **Age** | **Classifier3** | **AI Spec4** | **Risk of bias** | **Reference** |
| Fractional anisotropy | | | | | | | | | | |
| PCA | | 41/32 | LOOCV | 75.3 | 71.9/71.9 | - | SVM | Linear kernel | ?✓✕? | (Adluru et al. 2009) |
| Fiber density + Fiber bundle cross-section | | | | | | | | | | |
| t test-LASSO-RFE | | 26/26*** | 10-fold | 73.1 | 71.1/75.1 | C | SVM | Linear kernel | ✓✓✕✓ | (Zhang and Zheng 2020) |
| Fractional anisotropy + Mean diffusivity | | | | | | | | | | |
| S2n | | 70/80 | LOOCV | 81.3 | - | B | SVM | Polynomial kernel | ✓✓✕? | (Zhang et al. 2016) |
| S2n | | 45/30 | LOOCV | 80 | 74/84 | B | SVM | RBF kernel | ✕✓✕✓ | (Ingalhalikar et al. 2011) |
| S2n | | 70/79 | 10-fold | 78.3 | 84.8/72.9 | B | SVM | Polynomial kernel | ✓✓✓✓ | (Zhang et al. 2018) |
| Fractional anisotropy + Axial diffusivity + Radial diffusivity + Spherical harmonics | | | | | | | | | | |
| t test | | 19/19 | LOOCV | 86.8 | - | A | Ensemble | RF | ✓✓✓? | (Mostapha et al. 2015) |
| Fractional anisotropy + Mean diffusivity + Axial diffusivity + Radial diffusivity + Skewness | | | | | | | | | | |
| RFE | | 125/100* | 5-fold | 99 | - | B+C | SVM | Linear kernel | ✕✓✓✓ | (ElNakieb et al. 2021) |
| None | | 30/30 | 70:30 | 94.7 | 91.7/100 | B+C | QDA | - | ✓✓✓✓ | (Lange et al. 2010) |
| S2n | | 124/139*** | LOOCV | 73 | 70/76 | B | SVM | Linear kernel | ✕✓✕✓ | (Elnakieb et al. 2020) |
| Graph metrics | | | | | | | | | | |
| Graph based-LLFS | | 43/51* | LOOCV | 68 | 70/65.3 | B | Ensemble | - | ?✓✕✓ | (Tolan and Isik 2018) |
| Graph based | | 42/37* | LOOCV | 68 | - | B | SVM | Gaussian kernel | ?✕✕✓ | (Dodero et al. 2015a) |
| **EEG** | | | | | | | | | | |
| **Feature Selection2** | **Channels** | **ASD/TD** | **Validation** | **Accuracy** | **Sen/Spe** | **Age** | **Classifier3** | **AI Spec4** | **Risk of Bias** | **Reference** |
| Entropy + Spatiotemporal features | | | | | | | | | | |
| MI | 128 | 48/48 | 10-fold | 95.7 | - | B | SVM | Gaussian kernel | ✓✓✓? | (Kang et al. 2021) |
| LLFS | 18 | 15/10 | LOOCV | 92.8 | - | B | Ensemble | RF | ✕✓✓✓ | (Grossi et al. 2017) |
| Frequency-domain + Spatiotemporal features | | | | | | | | | | |
| Manual | 19 | 9/9 | 78:22 | 95.5 | - | B | PNN | - | ?✓✓✓ | (Ahmadlou et al. 2012) |
| Manual | 19 | 10/9 | - | 89.5 | - | B | KNN | - | ✕✓?✓ | (Behnam et al. 2008) |
| Complex networks | | | | | | | | | | |
| Graph based | 128 | 12/12 | LOOCV | 94.7 | 85.7/100 | B | SVM | Polynomial kernel | ?✓✓✕ | (Jamal et al. 2014) |
| MI | 21 | 28/28 | 10-fold | 92.3 | - | B | SVM | Gaussian kernel | ✓✓✕✓ | (Wadhera and Kakkar 2021) |
| PCA | 24 | 430/554 | 50:50 | 86 | - | B | DFA | - | ✓✓✓✓ | (Duffy and Als 2012) |
| Graph based | 10 | 30/30 | LOOCV | 81.7 | 83.3/80 | B | KNN | - | ✕?✕✕ | (Bajestani et al. 2019) |
| Entropy + Frequency-domain + Time-domain + Non-linear features | | | | | | | | | | |
| None | - | 48/50 | 50:50 | 97.9 | 96/95.8 | B | PSN-ANFIS | - | ??✓✕ | (Satheesh Kumar et al. 2018) |
| MI | 10 | 34/11 | 70:30 | 94.7 | 99.1/- | B | SVM | Linear kernel | ✕✕✓✓ | (Abdolzadegan et al. 2020) |
| Entropy + Non-linear features | | | | | | | | | | |
| RFE | 19 | 18/23 | 10-fold | 97 | 100/94 | B | SVM | Linear kernel | ✕✓✕✓ | (Bosl et al. 2017) |
| PCA | 17 | 7/7 | LOOCV | 92.9 | 100/85.7 | B | SVM | RBF kernel | ✕✓✓✓ | (Heunis et al. 2018) |
| None | 19 | 20/20 | 75:25 | 91.9 | - | B | RNN | - | ?✓✓✓ | (Manoharan and Radhakrishnan 2021) |
| RFE | 19 | 21/102 | LOOCV | 90.2 | 95/89 | A | SVM | RBF kernel | ✓✓✕✓ | (Bosl et al. 2018) |
| Entropy + Frequency-domain + Non-linear features | | | | | | | | | | |
| None | 64 | 9/10 | 10-fold | 84.5 | - | B | KNN | - | ✕✓✕? | (Ibrahim et al. 2018) |
| Time-domain features | | | | | | | | | | |
| Manual | 40 | 10/10 | 3-fold | 98.6 | - | C | SVM | Linear kernel | ✓✓✕✓ | (Castelhano et al. 2018) |
| Event-related potentials | | | | | | | | | | |
| ICA | 19 | 41/32 | - | 90.4 | 90.4/89.8 | B | SVM | Linear kernel | ✓✓?? | (Subudhi et al. 2020) |
| Manual | 128 | 19/30 | LOOCV | 79 | 68/87 | B | NB | - | ✕✓✓✓ | (Eldridge et al. 2014) |
| GA | 128 | 19/112 | 70:30 | 70 | 40/100 | A | SVM | Linear kernel | ✕✓✓✓ | (Gui et al. 2021) |
| Entropy + Frequency-domain features | | | | | | | | | | |
| Manual | 14 | 89/94 | 10-fold | 99.7 | 99.9/95.9 | B | SVM | Polynomial kernel | ✓✓✓✓ | (Askari et al. 2018a) |
| None | 16 | 8/4 | 10-fold | 99.7 | - | B | FCNN | - | ✕✓✕? | (Djemal et al. 2017) |
| t test | 64 | 40/37 | 10-fold | 98.7 | 100/97.3 | B | PNN | - | ✓✓✓✓ | (Pham et al. 2020) |
| LLFS | 19 | 10/18 | LOOCV | 96 | 90/100 | - | SVM | RBF kernel | ?✓✓✕ | (Salehi et al. 2022) |
| Manual | 23 | 9/10 | 10-fold | 91.2 | - | B | FCNN | - | ✕✓✕? | (Alturki et al. 2020) |
| - | 128 | 25/25 | - | 87 | - | B | SVM | Linear kernel | ?✓?✓ | (Li et al. 2018c) |
| Manual | 16 | 100/100 | 10-fold | 86 | 85.9/89.7 | B | SVM | Polynomial kernel | ✓✓✓✓ | (Askari et al. 2018b) |
| Frequency-domain features | | | | | | | | | | |
| None | 32 | 8/9 | 10-fold | 98.3 | 98/98 | B | Ensemble | RF | ✕✓✕✓ | (Jayawardana et al. 2019) |
| LLFS | 64 | 61/61 | 10-fold | 96.4 | 97.8/93.2 | B | SVM | Polynomial kernel | ✓✓✓✓ | (Baygin et al. 2021) |
| Manual | 19 | 15/11 | - | 96.2 | - | B | KNN | - | ✓??✓ | (Sheikhani et al. 2009) |
| PCA | 16 | 12/4 | 10-fold | 95.2 | 97.1/90.9 | B+C | SVM | Linear kernel | ✕✓✕? | (Tawhid et al. 2020) |
| PCA | 64 | 60/60 | - | 94.4 | 100/88.9 | B | FCNN | - | ?✓?? | (Abdulhay et al. 2018) |
| Manual | 32 | 10/5 | k-fold | 93.3 | - | B | Ensemble | RF | ?✕✕✓ | (Haputhanthri et al. 2019) |
| LLFS | 16 | 8/4 | 10-fold | 90 | - | B | FLDA | - | ✕✓✕? | (Kamel et al. 2012) |
| PCA | 8 | 6/6 | - | 90 | - | B | FCNN | - | ?✓?✕ | (Khazaal Shams and Abdul Rahman 2011) |
| LLFS | - | 8/10 | 18-fold | 88.9 | 88.9 | B | FLDA | - | ??✕✕ | (Alsaggaf and Kamel 2014) |
| Manual | 8 | 6/6 | 5-fold | 86.6 | - | - | FCNN | - | ??✕✕ | (Razali and Wahab 2011) |
| Manual | 128 | 36/69 | 5-fold | 85.2 | - | B+C | PTN | - | ?✕✓✓ | (Salekin and Russo 2021) |
| None | 22 | 10/10 | 5-fold | 81.9 | 91/100 | - | CNN | ResNet-50 | ?✓✕✕ | (Radhakrishnan et al. 2021) |
| Manual | 19 | 11/10 | - | 81 | - | B | KNN | - | ✕✓?✓ | (Sheikhani et al. 2007) |
| None | 16 | 13/4 | 70:15:15 | 80.9 | - | - | FCNN | - | ?✓✓✕ | (Mohi-Ud-Din and Jayanthy 2021) |
| Frequency-domain + Time-domain features | | | | | | | | | | |
| None | 8 | 46/63 | 10-fold | 92.7 | - | B | SVM | Linear kernel | ✓✓✓✓ | (Zhao et al. 2020b) |
| None | 16 | 8/18 | 10-fold | 80 | - | B | CNN | Standard | ?✓✕✕ | (Ranjani and Supraja 2021) |
| Non-linear features | | | | | | | | | | |
| - | 32 | 8/9 | 5-fold | 85.5 | - | B | FCNN | - | ?✕✕✕ | (Aslam et al. 2021) |
| MI | 2 | 34/27 | 5-fold | 82 | 94.1/66.7 | B | SVM | RBF kernel | ?✕✓✕ | (Ghoreishi et al. 2021) |
| Raw data | | | | | | | | | | |
| ICA | 16 | 9/10 | 10-fold | 99.5 | - | B | Ensemble | RNN-GRU + CNN | ?✓✕? | (Bouallegue et al. 2020) |
| None | 16 | 8/12 | 80:10:10 | 80 | - | B | CNN | Standard | ?✓✓? | (Ali 2020) |
| Frequency-domain + Non-linear features | | | | | | | | | | |
| t test | 19 | 9/8 | 80:20 | 90 | - | B | FCNN | RBF | ✓✓✓✕ | (Ahmadlou et al. 2010) |
| t test | 19 | 17/11 | - | 78.5 | 80/71 | B | KNN | - | ✕✓?✓ | (Sheikhani et al. 2012) |
| **Eye Tracking** | | | | | | | | | | |
| **Feature Selection2** | | **ASD/TD** | **Validation** | **Accuracy** | **Sen/Spe** | **Age** | **Classifier3** | **AI Spec4** | **Risk of bias** | **Reference** |
| Interactions with parents | | | | | | | | | | |
| Manual | | 6/26 | LOOCV | 93.8 | 100/92.3 | A | VMM | - | ?-✓? | (Alie et al. 2011) |
| Watching videos | | | | | | | | | | |
| LLFS | | 61/72 | 10-fold | 87.5 | 87.5/87.5 | B | SVM | Linear kernel | ✕-✓✓ | (Ozdemir et al. 2022) |
| Manual | | 17/15 | 75:25 | 83.4 | 100/66.6 | B | LSTM | - | ?-✓? | (Carette et al. 2018) |
| PCA | | 29/30 | 10-fold | AUC 92 | - | A | FCNN | - | ?-✕✓ | (Carette et al. 2019) |
| GA | | 76/30 | 5-fold | AUC 82 | 69/93 | B | FCNN | - | ?-✓✓ | (Oliveira et al. 2021) |
| Watching websites | | | | | | | | | | |
| t test-RFE | | 15/15 | 80:20 | 91.6 | 92.9/90 | C | DT | - | ✓-✓✓ | (Khalaji 2021) |
| Manual | | 15/15 | 70:30 | 70 | - | C | LR | Simple LR | ✓-✓✓ | (Yaneva et al. 2018) |
| Manual | | 19/19 | 70:30 | 65 | - | C | LR | Simple LR | ✕-✓✓ | (Yaneva et al. 2020) |
| None | | 15/15 | 66:33 | 60 | - | C | STA | - | ✓-✓✓ | (Eraslan et al. 2020) |
| Observing images | | | | | | | | | | |
| F score | | 20/19 | LOOCV | 92 | 93/92 | C | Ensemble | CNN + SVM | ✓-✓✓ | (Jiang and Zhao 2017) |
| LLFS | | 14/14 | 75:25 | 59.3 | 68.4/50.6 | B | DT | - | ✓-✓✓ | (Arru et al. 2019) |
| Saliency maps | | | | | | | | | | |
| None | | 14/14 | LOOCV | 99.8 | 100/99.7 | - | Ensemble | XGBoost | ?-✓? | (Rahman et al. 2021) |
| None | | 20/19 | LOOCV | 99 | 100/98 | - | Ensemble | CNN + LSTM | ?-✓? | (Chen and Zhao 2019) |
| Manual | | 37/37 | 5-fold | 85.1 | 86.5/83.8 | B | SVM | Linear kernel | ✓-✓✓ | (Wan et al. 2019) |
| None | | 14/14 | 60:15:25 | 62.1 | 71/54 | B | CNN | ResNet-50 | ?-✓? | (Liaqat et al. 2021) |
| Virtual reality | | | | | | | | | | |
| RFE | | 35/20 | 5-fold | 86 | 91/82 | B | SVM | Linear kernel | ?-✕✓ | (Alcaniz et al. 2022) |
| LLFS | | 55/52 | 3-fold | 73 | 81/65.8 | C | Ensemble | - | ✓-✓? | (Lin et al. 2022) |
| Watching faces | | | | | | | | | | |
| LLFS | | 29/48 | LOOCV | 88.5 | 93.1/86.2 | B | SVM | RBF kernel | ?-✕✕ | (Liu et al. 2016) |
| LLFS | | 20/41 | LOOCV | 86.9 | - | B | SVM | RBF kernel | ?-✕✕ | (Liu et al. 2015) |
| MRMR | | 77/80 | 10-fold | 84.2 | - | B | SVM | Linear kernel | ✓-✓✓ | (Kang et al. 2020a) |
| Face-to-face conversations | | | | | | | | | | |
| FFS | | 20/19 | LOOCV | 92.3 | 84.2/100 | B | SVM | Linear kernel | ✓-✓✓ | (Zhao et al. 2021) |
| **Facial Recognition** | | | | | | | | | | |
| **Feature Selection2** | | **ASD/TD*** | **Validation** | **Accuracy** | **Sen/Spe** | **Age** | **Classifier3** | **AI Spec4** | **Risk of bias** | **Reference** |
| Static facial features | | | | | | | | | | |
| None | | 556/556 | 80:20 | 95 | 95/95 | B | CNN | VGG-16 + TL | ✕✕✓? | (Lu and Perkowski 2021) |
| None | | 1507/1507** | 90:10 | 94.6 | - | B | CNN | MobileNet-V1 | ✕✕✓✕ | (Beary et al. 2020) |
| None | | 1269/1269** | 92:8 | 91.5 | 93.4/89.7 | B | CNN | DenseNet | ✕✕✓✕ | (Sandeep and Kumar 2021) |
| None | | 1468/1468** | 80:20 | 91 | - | B | CNN | VGG-16 + TL | ✕✕✓✕ | (Ram Arumugam et al. 2021) |
| None | | 1468/1468** | 70:30 | 91 | - | B | CNN | VGG-16 + TL | ✕✕✓✕ | (Arumugam et al. 2021) |
| None | | 1468/1468** | 87:3:10 | 90.7 | 90.7/90.7 | B | CNN | MobileNet-V1 + TL | ✕✕✓✕ | (Akter et al. 2021) |
| None | | 1468/1468** | 86:4:10 | 90 | 88.5/91.7 | B | CNN | Xception + TL | ✕✕✓✕ | (Mujeeb Rahman and Subashini 2022) |
| None | | 1426/1374** | 86:7:7 | 87 | - | B | CNN | MobileNet-V1 | ✕✓✓✕ | (Khosla et al. 2021) |
| None | | 1568/1568** | 81:16:3 | 87 | 87/87 | B | CNN | MobileNet-V1 + TL | ✕✕✓✕ | (Sadik et al. 2021) |
| Facial attribute recognition | | | | | | | | | | |
| Manual | | 20/26 | LOOCV | 80.8 | - | B | CNN | - | ✕✓✓✓ | (Banire et al. 2021) |
| Manual | | 49/39 | LOOCV | 72.9 | 76/69 | - | CNN | BottleNeck + TL | ✕✕✓✕ | (Li et al. 2019a) |
| **S-MRI** | | | | | | | | | | |
| **Feature Selection2** | | **ASD/TD** | **Validation** | **Accuracy** | **Sen/Spe** | **Age** | **Classifier3** | **AI Spec4** | **Risk of bias** | **Reference** |
| Volume-based morphological features | | | | | | | | | | |
| Manual | | 24/24* | LOOCV | 98 | - | B+C | Ensemble | RF | ??✓✓ | (Song et al. 2021) |
| None | | 74/208 | 10-fold | 92 | 87/93 | A | Ensemble | CNN + SFCNN | ✓✓✓✓ | (Gao et al. 2021) |
| VBM | | 24/24 | 10-fold | 92 | - | B | SVM | RBF kernel | ✓✓✕✓ | (Uddin et al. 2011) |
| F score | | 78/104* | 10-fold | 90.4 | 84.4/95.9 | B+C | AE + Softmax | Stacked SAE | ✕✓✓✓ | (Kong et al. 2019) |
| VBM | | 60/60 | LOOCV | 86.7 | 86.4/86.8 | C | SVM | Linear kernel | ✓✓✕✓ | (Gorriz et al. 2019) |
| VBM | | 36/36 | LOOCV | 81 | 81/81 | C | LDA | PLS | ✓✓✕✓ | (Sato et al. 2017) |
| Manual | | 52/40 | 10-fold | 77.2 | - | B | SVM | Linear kernel | ✕?✓✓ | (Segovia et al. 2014) |
| RFE | | 22/22 | LOOCV | 77 | 77/77 | C | SVM | Linear kernel | ✓✓✓✓ | (Ecker et al. 2010b) |
| LASSO | | 54/57* | 10-fold | 75.4 | 74.6/76 | B | SVM | Linear kernel | ✕✓✓✓ | (Wang et al. 2016) |
| Manual | | 120/136* | 80:20 | 73 | 92/68 | C | SVM | Linear kernel | ?✓✓✓ | (Denier et al. 2022) |
| VBM | | 79/105* | 75:25 | 70 | 53/72 | B+C | DNN | PBL-McRBFN | ?✓✓✓ | (Vigneshwaran et al. 2013) |
| None | | 1555/12623 | 66:17:17 | 66.4 | - | All | CNN | Ensemble | ✕✓✓✓ | (Leming et al. 2021) |
| None | | 1060/1166* | 5-fold | 63.8 | - | B+C | CNN | Fed-3D-Resnet-18 | ✕?✓✓ | (Fan et al. 2021) |
| VBM | | 449/451* | 75:25 | 59.6 | - | B+C | DNN | PBL-McRBFN | ✕✓✓✓ | (Subbaraju et al. 2015) |
| VBM-RFE | | 38/38 | LOOCV | AUC 80 | - | B | SVM | Linear kernel | ✓✓✓✓ | (Calderoni et al. 2012) |
| Surface-based morphological features | | | | | | | | | | |
| LASSO-DL | | 364/361* | 10-fold | 83 | 80/85 | B+C | Ensemble | - | ✓✓✓✓ | (Fu et al. 2021) |
| RFE | | 100/100* | 60:40 | 80 | 72.5/67.5 | B+C | Ensemble | - | ?✓✓✓ | (Bilgen et al. 2020) |
| LLFS-PCA | | 50/150* | 5-fold | 75 | 98.6/40 | C | SVM | Linear kernel | ✓✓✓✓ | (Graa and Rekik 2019) |
| Cortical thickness | | | | | | | | | | |
| RFE | | 20/20 | LOOCV | 90 | 90/90 | C | SVM | Linear kernel | ✕✓✓✓ | (Ecker et al. 2010a) |
| None | | 22/16 | 10-fold | 87 | 95/75 | B | LMT | - | ✓✓✕✓ | (Jiao et al. 2010) |
| RFE | | 40/36 | LOOCV | 84.2 | 80/88.9 | B | SVM | RBF kernel | ✕?✕✓ | (Squarcina et al. 2021) |
| MRMR | | 325/325* | 5-fold | 62 | - | B+C | FCNN | - | ✕✓✓✓ | (Demirhan 2018) |
| Normalized image | | | | | | | | | | |
| None | | 112/102* | 5-fold | 99 | 99/99 | C | Ensemble | CNN + SFCNN | ✓✓✓✓ | (Tummala 2021) |
| None | | 521/573* | - | 87 | - | - | CNN | ResNet-50 | ✕✕?✓ | (Nur Syahindah Husna et al. 2021) |
| DSM | | 171/176 | 65:22:13 | 84.4 | 85/84 | A | CNN | CSResNet-18 | ✓✓✓✓ | (Guo et al. 2022) |
| GA | | 500/500* | 5-fold | 73 | - | B | CNN | 3D CNN | ✕✓✓✓ | (Shahamat and Saniee Abadeh 2020) |
| None | | 500* | - | 71 | 66/69 | B+C | CNN | 3D-ResNet | ?✕?✓ | (Chen et al. 2021a) |
| None | | 946/1046* | 80:20 | 64 | - | B+C | CNN | 3D CNN | ✕✓✓✓ | (Ke et al. 2020) |
| Volume-based morphological features + Cortical thickness | | | | | | | | | | |
| t test-MRMR-RFE | | 58/59*** | 2-fold | 96.3 | 95/97 | B | SVM | Multi kernel | ✓?✓✓ | (Wee et al. 2014) |
| None | | 245/245* | 90:10 | 60 | - | B+C | LDA | - | ✓✓✓✓ | (Haar et al. 2016) |
| None | | 83/105 | 70:30 | AUC 64 | - | C | AE + Softmax | Denoising AE | ✓✓✓✓ | (Pinaya et al. 2019) |
| Surface-based morphological features + Cortical thickness | | | | | | | | | | |
| Elastic net-LASSO | | 100/100* | 66:33 | 96.3 | 95.5/97 | B | RR | - | ✓✓✓✓ | (Pua et al. 2019) |
| None | | 361/373* | LOOCV | 60 | 57/64 | B+C | Ensemble | RF | ✕?✕✓ | (Katuwal et al. 2015) |
| Surface-based morphological features + Clinical data | | | | | | | | | | |
| Manual | | 26/24* | 70:30 | 88 | 80/92.9 | - | Ensemble | RF | ?✓✓✓ | (Mishra and Pati 2021) |
| Surface-based morphological features + Volume-based morphological features | | | | | | | | | | |
| RFE | | 209/530* | 85:15 | 80 | - | B+C | FCNN | - | ✕✓✓✓ | (Ali et al. 2021) |
| Manual | | 539/573* | LOOCV | 56.3 | - | B+C | FCNN | - | ✕✓✕✓ | (Sharif and Khan 2021) |
| Surface-based morphological features + Volume-based morphological features + Cortical thickness | | | | | | | | | | |
| LLFS | | 34/145*** | 10-fold | 93.8 | 88/95 | A | SVM | Linear kernel | ✓✓✓✓ | (Hazlett et al. 2017) |
| RFE | | 530/573* | 5-fold | 71.6 | - | B+C | FCNN | - | ✕✓✓✓ | (Ali et al. 2022) |
| None | | 325/325* | 5-fold | 59 | - | B+C | SVM | Linear kernel | ✕✓✓✓ | (Sabuncu et al. 2015) |
| Manual | | 1060/1166* | 75:25 | AUC 79 | - | B+C | LR | Simple LR | ✕✓✓✓ | (Ferrari et al. 2020) |
| VBM | | 21/20 | LOOCV | - | 81/65 | B | SVM | Linear kernel | ✓✓✓✓ | (Gori et al. 2015) |
| Volume-based morphological features + Clinical data | | | | | | | | | | |
| Manual | | 220/303* | 4-fold | 64 | 63/64 | All | SVM | Not mentioned | ✕??✓ | (Germann et al. 2021) |
| Histogram of oriented gradients | | | | | | | | | | |
| Threshold | | 55/209*** | 10-fold | 76.2 | - | B | CNN | Multi-channel | ✓✕✓✓ | (Li et al. 2018a) |
| LLFS | | 119/131* | 10-fold | 65 | 73/58 | B+C | SVM | Linear kernel | ✕?✓✓ | (Chen et al. 2020) |
| Path signature + Clinical data | | | | | | | | | | |
| None | | 30/30 | 10-fold | 87 | 83/90 | A | FCNN | SFCNN | ✓✓✓✓ | (Zhang et al. 2020) |
| Curvelet sub-bands | | | | | | | | | | |
| WT | | 76/75* | 10-fold | AUC 75 | 77/82 | B | SVM | RBF kernel | ✓✓✓✓ | (Alvarez-Jimenez et al. 2020) |
| Voxel density | | | | | | | | | | |
| t test | | 81/50 | LOOCV | 73.3 | 71.6/76 | B | Ensemble | - | ✕✓✕? | (Varol et al. 2012) |
| Volume-based morphological features + Voxel density | | | | | | | | | | |
| None | | 30/28* | 10-fold | 82 | 82.4/81.7 | B+C | CNN | 3D Grad-CAM | ?✓✕✓ | (Yang et al. 2021c) |
| Histogram of oriented gradients + Clinical data | | | | | | | | | | |
| MRMR | | 538/573* | 80:20 | 64.1 | 75.7/51.9 | B+C | SVM | RBF kernel | ✕✓✓✓ | (Ghiassian et al. 2016) |
| Structural covariance network | | | | | | | | | | |
| None | | 518/567* | 10-fold | 71.8 | 81.3/68.8 | B+C | CNN | ResNet | ✕✓✓✓ | (Gao et al. 2020) |
| Morphological brain networks | | | | | | | | | | |
| LLFS | | 155/186* | 10-fold | 76.7 | - | B+C | GNN | Hypergraph | ✕✓✓✓ | (Madine et al. 2020) |
| None | | 155/186* | 10-fold | 62.4 | - | B+C | Ensemble | - | ✕✓✓✓ | (Soussia and Rekik 2018) |
| Graph based | | 155/186* | 10-fold | 52 | - | B+C | SVM | Linear kernel | ??✓✓ | (Georges et al. 2020) |
| **T-fMRI** | | | | | | | | | | |
| **Feature Selection2** | | **ASD/TD** | **Validation** | **Accuracy** | **Sen/Spe** | **Age** | **Classifier3** | **AI Spec4** | **Risk of bias** | **Reference** |
| Dynamic bodies attention task | | | | | | | | | | |
| RFE | | 15/14 | LOOCV | 92.3 | 92.3/92.3 | C | SVM | Linear kernel | ✓✓✓✓ | (Chanel et al. 2016) |
| Social and non-social attention task | | | | | | | | | | |
| t test | | 23/22 | LOOCV | 90 | - | B | SVM | Linear kernel | ✓✓✓✓ | (Odriozola et al. 2016) |
| Thinking about social interactions | | | | | | | | | | |
| Manual | | 17/17*** | LOOCV | 97 | - | C | NB | Gaussian | ✓✓✓✓ | (Just et al. 2014) |
| Biopoint task | | | | | | | | | | |
| Manual | | 82/48 | 85:7:8 | 87.1 | - | - | CNN | 2C 3D CNN | ?✓✓? | (Li et al. 2018e) |
| None | | 72/43 | 60:20:20 | 79.8 | 72.6/85.4 | - | GNN | BrainGNN | ?✓✓✓ | (Li et al. 2021) |
| Graph based | | 75/43 | 80:20 | 76 | 82/68.8 | - | GNN | - | ?✓✓? | (Li et al. 2019b) |
| PCA | | 82/48 | 85:7:8 | F 89 | - | - | CNN | 2C 3D CNN | ?✓✓? | (Li et al. 2018d) |
| Biological motion perception task | | | | | | | | | | |
| Bootstrap | | 21/19 | 10-fold | 64.5 | 70.7/60.9 | B | LSTM | - | ?✓✕? | (Dvornek et al. 2018) |
| Language task + Theory of mind task | | | | | | | | | | |
| Manual-t test | | 13/14 | LOOCV | 96.3 | - | C | LR | Simple LR | ✓✓✓✓ | (Murdaugh et al. 2012) |
| Cognitive control task | | | | | | | | | | |
| Manual | | 29/29 | LOOCV | 82.8 | 82.8/82.8 | - | LR | Simple LR | ??✓✕ | (Wang et al. 2012) |
| Language task | | | | | | | | | | |
| LLFS | | 30/30*** | - | 75.8 | 74.8/76.7 | B | SNCAE | - | ?✓?✓ | (Haweel et al. 2019) |
| Response to speech | | | | | | | | | | |
| LLFS-WT | | 50/50*** | 4-fold | 86 | 82/92 | B | CNN | 2D CNN | ✓✓✓✓ | (Haweel et al. 2021c) |
| LLFS-WT | | 50/50*** | 10-fold | 80 | 84/76 | B | CNN | 2D CNN | ✓✓✓✓ | (Haweel et al. 2021b) |
| LLFS-WT-Manual | | 33/33*** | 4-fold | 77.2 | 78.1/76.5 | B | CNN | 1D CNN | ✓✓✓✓ | (Haweel et al. 2021a) |
| **Other Modalities** | | | | | | | | | | |
| **Feature Selection2** | | **ASD/TD** | **Validation** | **Accuracy** | **Sen/Spe** | **Age** | **Classifier3** | **AI Spec4** | **Risk of bias** | **Reference** |
| Functional near-infrared spectroscopy | | | | | | | | | | |
| None | | 22/22 | 70:30 | 95.7 | 97.1/94.3 | B | Ensemble | LSTM + CNN | ✕✓✓✓ | (Xu et al. 2020) |
| None | | 25/22 | 60:20:20 | 92.2 | 85/99.4 | B | Ensemble | GRU + CNN | ✕✓✓✓ | (Xu et al. 2019) |
| Manual | | 25/22 | 50:50 | 91.9 | 81.6/94.6 | B | SVM | Linear kernel | ✕✓✓✓ | (Li et al. 2016) |
| Kinematic features | | | | | | | | | | |
| Manual | | 15/15 | LOOCV | 96.7 | 100/93.8 | B | SVM | Linear kernel | ✓-✓✓ | (Crippa et al. 2015) |
| t test-FFS | | 18/20 | LOOCV | 92.1 | 88.9/95 | B | DT | - | ?-✓✓ | (Zhao et al. 2022) |
| t test-FFS | | 20/23 | LOOCV | 88.4 | 85/91.3 | B | KNN | - | ✓-✓✓ | (Zhao et al. 2019) |
| Manual | | 16/16 | 10-fold | 86.7 | 85.7/87.5 | C | SVM | Linear kernel | ✓-✕✓ | (Li et al. 2017b) |
| FDR | | 37/45 | 10-fold | AUC 93 | 83/85 | B | Ensemble | RGF | ✓-✓✓ | (Anzulewicz et al. 2016) |
| Response to name | | | | | | | | | | |
| PCA | | 22/21 | 75:25 | 93 | 100/92.3 | B | DT | - | ✓-✓✓ | (Liu et al. 2017) |
| Video analysis | | | | | | | | | | |
| Manual | | 149/79 | 70:30 | 88.9 | 94.5/77.4 | B | LR | Simple LR | ✕-✓? | (Tariq et al. 2018) |
| LLFS | | 9/124 | 75:8:17 | 82 | 92/71 | A | FCNN | - | ?-✓✓ | (Wu et al. 2021) |
| Taking photos | | | | | | | | | | |
| None | | 16/21 | 60:20:20 | 83.7 | - | C | CNN | VGG-16 + TL | ✓-✓✓ | (Ruan 2020) |
| Vocal analysis | | | | | | | | | | |
| Manual | | 1355/1257 | 45:55 | 86.5 | 84/89.2 | B | Ensemble | RF | ?-✓✓ | (Maenner et al. 2016) |
| PET scan | | | | | | | | | | |
| RFE | | 45/13 | LOOCV | 88 | 91/77 | B | LDA | - | ✓✓✓✓ | (Duchesnay et al. 2011) |
| **Multimodal** | | | | | | | | | | |
| **Feature Selection2** | | **ASD/TD** | **Validation** | **Accuracy** | **Sen/Spe** | **Age** | **Classifier3** | **AI Spec4** | **Risk of bias** | **Reference** |
| rs-fMRI + S-MRI | | | | | | | | | | |
| Manual | | 27/24* | 70:30 | 97.8 | 98/97.6 | B | CNN | TPNAS-Net | ✓✓✓✓ | (Liu et al. 2022) |
| F score-AE | | 368/449* | 10-fold | 85.1 | 81/89 | B+C | FCNN | - | ✕✓✓✓ | (Rakic et al. 2020) |
| LLFS | | 72/113*** | 4-fold | 80.8 | 84.9/79.2 | B | Ensemble | RF | ✓✓✓✓ | (Dekhil et al. 2019) |
| SMF-Graph based | | 201/251* | 95:5 | 74.8 | - | B | DT | - | ?✓✓✓ | (Itani and Thanou 2021) |
| LLFS | | 561/521* | - | 73 | - | B+C | Ensemble | RF | ✕✓?✓ | (Dekhil et al. 2020) |
| None | | 481/526* | 10-fold | 72.7 | 67.8/76.6 | B+C | GNN | ANE + FCNN | ✕✓✓✓ | (Chen et al. 2021c) |
| PCA-MRMR | | 127/153* | 80:20 | 70 | - | B | Ensemble | RF | ✓✓✓✓ | (Zhou et al. 2014) |
| None | | 116/69* | 10-fold | 65.6 | 84/33 | B | DBN | - | ?✓✓✓ | (Akhavan Aghdam et al. 2018) |
| AE-LLFS-PCA-ICA | | 538/573* | 70:30 | 64.3 | 60/68.3 | B+C | SVM | Multi kernel | ✕✓✓✓ | (Sen et al. 2018) |
| VAE-LLFS | | 539/573* | - | 62.6 | - | B+C | GNN | - | ✕✓?✓ | (M and Jaganathan 2021) |
| rs-fMRI + DWI/DTI | | | | | | | | | | |
| Graph based | | 403/468* | 80:20 | 60.9 | 53.5/69.4 | B+C | SVM | RBF kernel | ✕✓✓✓ | (Brahim and Farrugia 2020) |
| rs-fMRI + S-MRI + DWI/DTI | | | | | | | | | | |
| LLFS | | 46/47 | 66:33 | 92.5 | 97.8/87.2 | B | Ensemble | CRF | ✓✓✓✓ | (Eill et al. 2019) |
| LLFS | | 31/23* | LOOCV | 72.3 | - | B | SVM | Linear kernel | ?✓✓✓ | (Crimi et al. 2017) |
| T-fMRI + DWI/DTI + Clinical data | | | | | | | | | | |
| RFE-LLFS-t test | | 15/15 | 53:47 | 95.9 | 96.9/94.8 | B+C | SVM | Linear kernel | ?✓✓✓ | (Deshpande et al. 2013) |
| S-MRI + DWI/DTI | | | | | | | | | | |
| PCA | | 110/83*** | 10-fold | 93.3 | 93.6/96.2 | B | SVM | RBF kernel | ✓✓✓✓ | (Irimia et al. 2018) |
| RFE | | 58/48 | 5-fold | 88.8 | 93/83.8 | B | Ensemble | RF | ✓✓✓✓ | (Kim et al. 2023) |
| t test | | 16/16 | LOOCV | 86.7 | 87.3/86.1 | B | SVM | RBF kernel | ✓✓✓✓ | (Goch et al. 2014) |
| VBM | | 14/33 | 70:30 | 75.3 | 24.8/97 | B | Ensemble | RF | ✓✓✓✓ | (Payabvash et al. 2019) |
| EEG + Eye tracking | | | | | | | | | | |
| PCA-FFS | | 24/28 | 80:20 | 100 | - | - | NB | Gaussian | ?✓✓? | (Thapaliya et al. 2018) |
| None | | 21/21 | 80:20 | 95 | 95/95 | B | GNN | GFT + FCNN | ✓✓✓? | (Zhang et al. 2021b) |
| MRMR | | 49/48 | - | 85.4 | - | B | SVM | Linear kernel | ✓✓?✓ | (Kang et al. 2020b) |
| rs-fMRI + Genetic | | | | | | | | | | |
| RFE-t test | | 47/24*** | LOOCV | 86 | 81/88 | B+C | SVM | Multi kernel | ✓✓✓✓ | (Lu et al. 2021) |
| Kinematic + Eye tracking | | | | | | | | | | |
| t test-LLFS | | 22/22 | 68:32 | 78 | 57/99 | C | SVM | RBF kernel | ✓-✓✕ | (Vabalas et al. 2020) |
| S-MRI + DTI + MRS | | | | | | | | | | |
| RFE | | 19/18 | LOOCV | 91.9 | - | C | DT | - | ✓✓✓✓ | (Libero et al. 2015) |
| Acc: Accuracy, ASD: Autism spectrum disorder, LOOCV: Leave-one-out cross-validation, Sen: Sensitivity, Spe: Specificity, TD: Typically developing.  DWI/DTI: Diffusion-weighted imaging/Diffusion-tensor imaging, EEG: Electroencephalography, rs-fMRI: Resting-state functional magnetic resonance imaging, S-MRI: Structural magnetic resonance imaging, T-fMRI: Task-based functional magnetic resonance imaging.  The classifications for the age are A: Toddlers (<2y), B: Children and adolescents (2-18y), C: Adults (>18y).  For the risk of bias, the first dot on the left is indicative of the patient selection domain, next is for the index test (modality) domain, next one is for the index test (AI algorithm) domain, and the last one on the right is indicative of the reference standard domain. ✓ means low risk of bias, ? means unclear risk of bias, ✕ means high risk of bias, and - means that domain is not applicable for the study.  * Data is from the ABIDE dataset  ** Data is from the Kaggle dataset.  *** Data is from the NDAR dataset. | | | | | | | | | | |
| **1:** AAL: Automated anatomical labelling atlas, BASC: Bootstrap analysis of stable clusters, CC200: Craddock-200 atlas, CC400: Craddock-400 atlas, DES: Destrieux atlas, DK: Desikan–Killiany atlas, DLA: Dictionary learning algorithm, DOS: Dosenbach atlas, HBM: Hierarchical Bayesian model, HO: Harvard-Oxford atlas, IP-TFP: Instantaneous phase transfer function perturbation, RBS: Region based segmentation, RSN: Resting-state networks, SBC: Social brain connectome atlas | | | | | | | | | | |
| **2:** AE: Autoencoder, BOF: Bag of feature, BS: Bootstrapping, DL: Dictionary learning, DR: Dual regression, DSM: Dominant-sequence model, EIIC: Extended invariant information clustering, EW: Element-wise filters, FFS: Forward feature selection, GA: Genetic algorithm, GARCH: Generalized autoregressive conditional heteroscedasticity, HMM: Hidden Markov model, IBP: Indian buffet processes, ICA: Independent component analysis, L1SCCA: L1-norm regularized sparse canonical correlation analysis, LASSO: Least absolute shrinkage and selector operation, LEAN: Layer-wise elimination of accessory nodes, LLFS: Local learning-based feature selection, MCNFD: Multi-site clustering and nested feature extraction, MI: Mutual information, MRMR: Maximal relevance and minimal redundancy, MSDL: Multi-subject dictionary learning, MSTEPS: Multiscale stepwise selection, PCA: Principal component analysis, RFE: Recursive feature elimination, S2n: Signal to nose ratio, SLR: Sparse low-rank representation, SMF: Spatial feature based detection, VBM: Voxel based morphometry, WT: Wavelet transform | | | | | | | | | | |
| **3:** AE: Autoencoder, CNN: Convolutional neural network, DBN: Deep belief network, DFA: Discriminant factor analysis, DNN: Deep neural network, DRBM: Discriminative restricted Boltzmann machine, DT: Decision tree, FCNN: Fully-connected neural network, FLDA: Fisher’s linear discriminant analysis, GNN: Graph neural network, KNN: K-nearest neighbors, LDA: Linear discriminant analysis, LMT: Logistic model trees, NB: Naïve Bayes, LR: Logistic regression, LSTM: Long-short term memory, PNN: Probabilistic neural network, PSN-ANFIS: Particle swarm optimization-Adaptive network-based fuzzy inference system, PTN: Prototypical network, QDA: Quadratic discriminant analysis, RNN: Recurrent neural network, RR: Ridge regression, SNCAE: Stacked nonnegativity constraint autoencoder, Sparse-MVTC: Sparse multi-view task-centralized learning, STA: Scanpath trend analysis, SVM: Support vector machine, VMM: Variable-order Markov model | | | | | | | | | | |
| **4:** AE: Autoencoder, ANE: Attention-based node-edge, CNN: Convolutional neural network, CRF: Conditional random forest, DANN: Deep attention neural network, FCNN: Fully-connected neural network, GAT: Graph attention network, GFT: Graph Fourier transform, GRU: Gate recurrent unit, hi-GCN: Hierarchical graph convolutional network, ID: Invertible dynamic, LR: Logistic regression, LR-GCN: Low-rank subspace graph convolutional network, LSTM: Long-short term memory, MT: Multi template, PBL-McRBFN: Projection based learning metacognitive radial basis function network, PLS: Partial least squares, PNN: Probabilistic neural network, PTN: Prototypical network, RBF: Radial basis function, RF: Random forest, RGF: Regularized greedy forest, RNN: Recurrent neural network, s-GCN: Siamese graph convolutional network, SAE: Sparse autoencoder, SFCNN: Siamese fully connected neural network, Sparse-MVTC: Sparse multi-view task-centralized learning, TL: Transfer learning, TPNAS-Net: Topology preserving neural architecture search network | | | | | | | | | | |

## References

Abdolzadegan, D., Moattar, M.H., and Ghoshuni, M. (2020). A robust method for early diagnosis of autism spectrum disorder from EEG signals based on feature selection and DBSCAN method. *Biocybern. Biomed. Eng.* 40: 482-493.

Abdulhay, E., Alafeef, M., Alzghoul, L., Al Momani, M., Al Abdi, R., Arunkumar, N., Munoz, R., and de Albuquerque, V.H.C. (2018). Computer-aided autism diagnosis via second-order difference plot area applied to EEG empirical mode decomposition. *Neural Comput. Appl.* 32: 10947-10956.

Abraham, A., Milham, M.P., Di Martino, A., Craddock, R.C., Samaras, D., Thirion, B., and Varoquaux, G. (2017). Deriving reproducible biomarkers from multi-site resting-state data: An Autism-based example. *NeuroImage* 147: 736-745.

Adluru, N., Hinrichs, C., Chung, M.K., Lee, J.E., Singh, V., Bigler, E.D., Lange, N., Lainhart, J.E., and Alexander, A.L. (2009). Classification in DTI using shapes of white matter tracts. *2009 Annual International Conference of the IEEE Engineering in Medicine and Biology Society.* IEEE.

Agastinose Ronicko, J.F., Thomas, J., Thangavel, P., Koneru, V., Langs, G., and Dauwels, J. (2020). Diagnostic classification of autism using resting-state fMRI data improves with full correlation functional brain connectivity compared to partial correlation. *J Neurosci Methods* 345: 108884.

Aghdam, M.A., Sharifi, A., and Pedram, M.M. (2019). Diagnosis of Autism Spectrum Disorders in Young Children Based on Resting-State Functional Magnetic Resonance Imaging Data Using Convolutional Neural Networks. *J Digit Imaging* 32: 899-918.

Ahammed, M.S., Niu, S., Ahmed, M.R., Dong, J., Gao, X., and Chen, Y. (2021a). Bag-of-Features Model for ASD fMRI Classification using SVM. *2021 Asia-Pacific Conference on Communications Technology and Computer Science (ACCTCS).* IEEE.

Ahammed, M.S., Niu, S., Ahmed, M.R., Dong, J., Gao, X., and Chen, Y. (2021b). DarkASDNet: Classification of ASD on Functional MRI Using Deep Neural Network. *Front Neuroinform* 15.

Ahmadlou, M., Adeli, H., and Adeli, A. (2010). Fractality and a wavelet-chaos-neural network methodology for EEG-based diagnosis of autistic spectrum disorder. *J Clin Neurophysiol* 27: 328-333.

Ahmadlou, M., Adeli, H., and Adeli, A. (2012). Fuzzy Synchronization Likelihood-wavelet methodology for diagnosis of autism spectrum disorder. *J Neurosci Methods* 211: 203-209.

Ahmed, M.R., Zhang, Y., Liu, Y., and Liao, H. (2020). Single Volume Image Generator and Deep Learning-Based ASD Classification. *IEEE J Biomed Health Inform* 24: 3044-3054.

Akhavan Aghdam, M., Sharifi, A., and Pedram, M.M. (2018). Combination of rs-fMRI and sMRI Data to Discriminate Autism Spectrum Disorders in Young Children Using Deep Belief Network. *J Digit Imaging* 31: 895-903.

Akter, T., Ali, M.H., Khan, M.I., Satu, M.S., Uddin, M.J., Alyami, S.A., Ali, S., Azad, A., and Moni, M.A. (2021). Improved Transfer-Learning-Based Facial Recognition Framework to Detect Autistic Children at an Early Stage. *Brain Sci* 11: 734-734.

Al-Hiyali, M.I., Yahya, N., Faye, I., Khan, Z., and Alsaih, K. (2021). Classification of BOLD FMRI Signals using Wavelet Transform and Transfer Learning for Detection of Autism Spectrum Disorder. *2020 IEEE-EMBS Conference on Biomedical Engineering and Sciences (IECBES).* IEEE.

Alcaniz, M., Chicchi-Giglioli, I.A., Carrasco-Ribelles, L.A., Marin-Morales, J., Minissi, M.E., Teruel-Garcia, G., Sirera, M., and Abad, L. (2022). Eye gaze as a biomarker in the recognition of autism spectrum disorder using virtual reality and machine learning: A proof of concept for diagnosis. *Autism Res* 15: 131-145.

Ali, M.T., ElNakieb, Y., Elnakib, A., Shalaby, A., Mahmoud, A., Ghazal, M., Yousaf, J., Abu Khalifeh, H., Casanova, M., Barnes, G., et al. (2022). The Role of Structure MRI in Diagnosing Autism. *Diagnostics (Basel)* 12: 165-165.

Ali, M.T., Elnakieb, Y.A., Shalaby, A., Mahmoud, A., Switala, A., Ghazal, M., Khelifi, A., Fraiwan, L., Barnes, G., and El-Baz, A. (2021). Autism Classification Using SMRI: A Recursive Features Selection Based on Sampling from Multi-Level High Dimensional Spaces. *2021 IEEE 18th International Symposium on Biomedical Imaging (ISBI).* IEEE.

Ali, N.A. (2020). Autism spectrum disorder classification on electroencephalogram signal using deep learning algorithm. *IAES Int. J. Artif. Intell.* 9: 91-91.

Alie, D., Mahoor, M.H., Mattson, W.I., Anderson, D.R., and Messinger, D.S. (2011). Analysis of eye gaze pattern of infants at risk of autism spectrum disorder using Markov models. *2011 IEEE Workshop on Applications of Computer Vision (WACV).* IEEE.

Almuqhim, F. and Saeed, F. (2021). ASD-SAENet: A Sparse Autoencoder, and Deep-Neural Network Model for Detecting Autism Spectrum Disorder (ASD) Using fMRI Data. *Front Comput Neurosci* 15.

Alsaggaf, E.A. and Kamel, M.I. (2014). Using EEGs to diagnose autism disorder by classification algorithm. *Life Science Journal* 11: 305-308.

Alturki, F.A., AlSharabi, K., Abdurraqeeb, A.M., and Aljalal, M. (2020). EEG Signal Analysis for Diagnosing Neurological Disorders Using Discrete Wavelet Transform and Intelligent Techniques. *Sensors (Basel)* 20: 2505-2505.

Alvarez-Jimenez, C., Munera-Garzon, N., Zuluaga, M.A., Velasco, N.F., and Romero, E. (2020). Autism spectrum disorder characterization in children by capturing local-regional brain changes in MRI. *Med Phys* 47: 119-131.

Anderson, J.S., Nielsen, J.A., Froehlich, A.L., DuBray, M.B., Druzgal, T.J., Cariello, A.N., Cooperrider, J.R., Zielinski, B.A., Ravichandran, C., Fletcher, P.T., et al. (2011). Functional connectivity magnetic resonance imaging classification of autism. *Brain* 134: 3742-3754.

Anirudh, R. and Thiagarajan, J.J. (2019). Bootstrapping Graph Convolutional Neural Networks for Autism Spectrum Disorder Classification. *ICASSP 2019 - 2019 IEEE International Conference on Acoustics, Speech and Signal Processing (ICASSP).* IEEE.

Anzulewicz, A., Sobota, K., and Delafield-Butt, J.T. (2016). Toward the Autism Motor Signature: Gesture patterns during smart tablet gameplay identify children with autism. *Sci Rep* 6: 31107.

Arru, G., Mazumdar, P., and Battisti, F. (2019). Exploiting Visual Behaviour for Autism Spectrum Disorder Identification. *2019 IEEE International Conference on Multimedia & Expo Workshops (ICMEW).* IEEE.

Arumugam, S.R., Balakrishna, R., Khilar, R., Manoj, O., and Shylaja, C.S. (2021). Prediction of Autism Spectrum Disorder in Children using Face Recognition. *2021 2nd International Conference on Smart Electronics and Communication (ICOSEC).* IEEE.

Askari, E., Setarehdan, S.K., Sheikhani, A., Mohammadi, M.R., and Teshnehlab, M. (2018a). Computational model for detection of abnormal brain connections in children with autism. *J. Integr. Neurosci.* 17: 237-248.

Askari, E., Setarehdan, S.K., Sheikhani, A., Mohammadi, M.R., and Teshnehlab, M. (2018b). Modeling the connections of brain regions in children with autism using cellular neural networks and electroencephalography analysis. *Artif Intell Med* 89: 40-50.

Aslam, A.R., Hafeez, N., Heidari, H., and Altaf, M.A.B. (2021). An 8.62 μ W Processor for Autism Spectrum Disorder Classification using Shallow Neural Network. *2021 IEEE 3rd International Conference on Artificial Intelligence Circuits and Systems (AICAS).* IEEE.

Ataei, S., Attar, N., Aliakbary, S., and Bakouie, F. (2019). Graph theoretical approach for screening autism on brain complex networks. *SN Appl. Sci.* 1: 1122-1122.

Bajestani, G.S., Behrooz, M., Khani, A.G., Nouri-Baygi, M., and Mollaei, A. (2019). Diagnosis of autism spectrum disorder based on complex network features. *Comput Methods Programs Biomed* 177: 277-283.

Banire, B., Al Thani, D., Qaraqe, M., and Mansoor, B. (2021). Face-Based Attention Recognition Model for Children with Autism Spectrum Disorder. *J Healthc Inform Res* 5: 420-445.

Barttfeld, P., Wicker, B., Cukier, S., Navarta, S., Lew, S., Leiguarda, R., and Sigman, M. (2012). State-dependent changes of connectivity patterns and functional brain network topology in autism spectrum disorder. *Neuropsychologia* 50: 3653-3662.

Baygin, M., Dogan, S., Tuncer, T., Datta Barua, P., Faust, O., Arunkumar, N., Abdulhay, E.W., Emma Palmer, E., and Rajendra Acharya, U. (2021). Automated ASD detection using hybrid deep lightweight features extracted from EEG signals. *Comput Biol Med* 134: 104548.

Bayram, M.A., ÖZer, İ., and TemurtaŞ, F. (2021). Deep Learning Methods for Autism Spectrum Disorder Diagnosis Based on fMRI Images. *Sakarya Univ. J. Comput. Inform. Sci.* 4: 142-155.

Beary, M., Hadsell, A., Messersmith, R., and Hosseini, M.-P. (2020). Diagnosis of Autism in Children using Facial Analysis and Deep Learning. *ArXiv.org*.

Behnam, H., Sheikhani, A., Mohammadi, M.R., Noroozian, M., and Golabi, P. (2008). Abnormalities in Connectivity of Quantitative Electroencephalogram Background Activity in Autism Disorders especially in Left Hemisphere and Right Temporal. *Tenth International Conference on Computer Modeling and Simulation (uksim 2008).* IEEE.

Benabdallah, F.Z., El Maliani, A.D., and El Hassouni, M. (2021). A CNN Based 3D Connectivity Matrices Features for Autism Detection: Application on ABIDE I. *Ubiquitous Networking*: 293-302.

Bernas, A., Aldenkamp, A.P., and Zinger, S. (2018). Wavelet coherence-based classifier: A resting-state functional MRI study on neurodynamics in adolescents with high-functioning autism. *Comput Methods Programs Biomed* 154: 143-151.

Bhaumik, R., Pradhan, A., Das, S., and Bhaumik, D.K. (2018). Predicting Autism Spectrum Disorder Using Domain-Adaptive Cross-Site Evaluation. *Neuroinformatics* 16: 197-205.

Bi, X.-a., Liu, Y., Sun, Q., Luo, X., Tan, H., Chen, J., and Zeng, N. (2019). The Genetic-Evolutionary Random Support Vector Machine Cluster Analysis in Autism Spectrum Disorder. *IEEE Access* 7: 30527-30535.

Bi, X.A., Chen, J., Sun, Q., Liu, Y., Wang, Y., and Luo, X. (2018a). Analysis of Asperger Syndrome Using Genetic-Evolutionary Random Support Vector Machine Cluster. *Front Physiol* 9: 1646.

Bi, X.A., Liu, Y., Jiang, Q., Shu, Q., Sun, Q., and Dai, J. (2018b). The Diagnosis of Autism Spectrum Disorder Based on the Random Neural Network Cluster. *Front Hum Neurosci* 12: 257.

Bi, X.A., Wang, Y., Shu, Q., Sun, Q., and Xu, Q. (2018c). Classification of Autism Spectrum Disorder Using Random Support Vector Machine Cluster. *Front Genet* 9: 18.

Bilgen, I., Guvercin, G., and Rekik, I. (2020). Machine learning methods for brain network classification: Application to autism diagnosis using cortical morphological networks. *J Neurosci Methods* 343: 108799.

Boppana, L., Shabnam, N., and Srivatsava, T. (2021). Deep Learning Approach for an early stage detection of Neurodevelopmental Disorders. *2021 IEEE 9th Region 10 Humanitarian Technology Conference (R10-HTC).* IEEE.

Bosl, W.J., Loddenkemper, T., and Nelson, C.A. (2017). Nonlinear EEG biomarker profiles for autism and absence epilepsy. *Neuropsychiatr. Electrophysiol.* 3: 1-1.

Bosl, W.J., Tager-Flusberg, H., and Nelson, C.A. (2018). EEG Analytics for Early Detection of Autism Spectrum Disorder: A data-driven approach. *Sci Rep* 8: 6828.

Bouallegue, G., Djemal, R., Alshebeili, S.A., and Aldhalaan, H. (2020). A Dynamic Filtering DF-RNN Deep-Learning-Based Approach for EEG-Based Neurological Disorders Diagnosis. *IEEE Access* 8: 206992-207007.

Brahim, A. and Farrugia, N. (2020). Graph Fourier transform of fMRI temporal signals based on an averaged structural connectome for the classification of neuroimaging. *Artif Intell Med* 106: 101870.

Brown, C.J., Kawahara, J., and Hamarneh, G. (2018). Connectome priors in deep neural networks to predict autism. *2018 IEEE 15th International Symposium on Biomedical Imaging (ISBI 2018).* IEEE.

Byeon, K., Kwon, J., Hong, J., and Park, H. (2020). Artificial Neural Network Inspired by Neuroimaging Connectivity: Application in Autism Spectrum Disorder. *2020 IEEE International Conference on Big Data and Smart Computing (BigComp).* IEEE.

Calderoni, S., Retico, A., Biagi, L., Tancredi, R., Muratori, F., and Tosetti, M. (2012). Female children with autism spectrum disorder: an insight from mass-univariate and pattern classification analyses. *NeuroImage* 59: 1013-1022.

Cancino, W., Africano, G., and Pertuz, S. (2021). A Benchmark of Preprocessing Strategies for Autism Classification from Resting-State Functional Magnetic Resonance Imaging. *2021 XXIII Symposium on Image, Signal Processing and Artificial Vision (STSIVA).* IEEE.

Cao, M., Yang, M., Qin, C., Zhu, X., Chen, Y., Wang, J., and Liu, T. (2021). Using DeepGCN to identify the autism spectrum disorder from multi-site resting-state data. *Biomed. Signal Process. Control* 70: 103015-103015.

Carette, R., Cilia, F., Dequen, G., Bosche, J., Guerin, J.-L., and Vandromme, L. (2018). Automatic Autism Spectrum Disorder Detection Thanks to Eye-Tracking and Neural Network-Based Approach. *Internet of Things (IoT) Technologies for HealthCare*: 75-81.

Carette, R., Elbattah, M., Cilia, F., Dequen, G., Guérin, J.-L., and Bosche, J. (2019). Learning to Predict Autism Spectrum Disorder based on the Visual Patterns of Eye-tracking Scanpaths. *Proceedings of the 12th International Joint Conference on Biomedical Engineering Systems and Technologies.* SCITEPRESS - Science and Technology Publications.

Castelhano, J., Tavares, P., Mouga, S., Oliveira, G., and Castelo-Branco, M. (2018). Stimulus dependent neural oscillatory patterns show reliable statistical identification of autism spectrum disorder in a face perceptual decision task. *Clin Neurophysiol* 129: 981-989.

Chaitra, N., Vijaya, P.A., and Deshpande, G. (2020). Diagnostic prediction of autism spectrum disorder using complex network measures in a machine learning framework. *Biomed. Signal Process. Control* 62: 102099-102099.

Chanel, G., Pichon, S., Conty, L., Berthoz, S., Chevallier, C., and Grezes, J. (2016). Classification of autistic individuals and controls using cross-task characterization of fMRI activity. *Neuroimage Clin* 10: 78-88.

Chen, C.P., Keown, C.L., Jahedi, A., Nair, A., Pflieger, M.E., Bailey, B.A., and Muller, R.A. (2015). Diagnostic classification of intrinsic functional connectivity highlights somatosensory, default mode, and visual regions in autism. *Neuroimage Clin* 8: 238-245.

Chen, H., Duan, X., Liu, F., Lu, F., Ma, X., Zhang, Y., Uddin, L.Q., and Chen, H. (2016). Multivariate classification of autism spectrum disorder using frequency-specific resting-state functional connectivity--A multi-center study. *Prog Neuropsychopharmacol Biol Psychiatry* 64: 1-9.

Chen, S. and Zhao, Q. (2019). Attention-Based Autism Spectrum Disorder Screening With Privileged Modality. *2019 IEEE/CVF International Conference on Computer Vision (ICCV).* IEEE.

Chen, T., Chen, Y., Yuan, M., Gerstein, M., Li, T., Liang, H., Froehlich, T., and Lu, L. (2020). The Development of a Practical Artificial Intelligence Tool for Diagnosing and Evaluating Autism Spectrum Disorder: Multicenter Study. *JMIR Med Inform* 8: 15767.

Chen, X., Wang, Z., Cheikh, F.A., and Ullah, M. (2021a). 3D-Resnet Fused Attention for Autism Spectrum Disorder Classification. *Image and Graphics*: 607-617.

Chen, Y., Liu, A., Fu, X., Wen, J., and Chen, X. (2021b). An Invertible Dynamic Graph Convolutional Network for Multi-Center ASD Classification. *Front Neurosci* 15.

Chen, Y., Yan, J., Jiang, M., Zhao, Z., Zhao, W., Zhang, R., Kendrick, K.M., and Jiang, X. (2021c). Attention-Based Node-Edge Graph Convolutional Networks for Identification of Autism Spectrum Disorder Using Multi-Modal MRI Data. *Pattern Recognition and Computer Vision*: 374-385.

Crimi, A., Dodero, L., Murino, V., and Sona, D. (2017). Case-control discrimination through effective brain connectivity. *2017 IEEE 14th International Symposium on Biomedical Imaging (ISBI 2017).* IEEE.

Crippa, A., Salvatore, C., Perego, P., Forti, S., Nobile, M., Molteni, M., and Castiglioni, I. (2015). Use of Machine Learning to Identify Children with Autism and Their Motor Abnormalities. *J Autism Dev Disord* 45: 2146-2156.

Dai, Z., Zhang, H., Lin, F., Feng, S., Wei, Y., and Zhou, J. (2021). The Classification System and Biomarkers for Autism Spectrum Disorder: A Machine Learning Approach. *Bioinformatics Research and Applications*: 289-299.

Dammu, P.S. and Bapi, R.S. (2019). Employing Temporal Properties of Brain Activity for Classifying Autism Using Machine Learning. *Pattern Recognition and Machine Intelligence*: 193-200.

Dekhil, O., Ali, M., El-Nakieb, Y., Shalaby, A., Soliman, A., Switala, A., Mahmoud, A., Ghazal, M., Hajjdiab, H., Casanova, M.F., et al. (2019). A Personalized Autism Diagnosis CAD System Using a Fusion of Structural MRI and Resting-State Functional MRI Data. *Front Psychiatry* 10: 392.

Dekhil, O., Ali, M., Haweel, R., Elnakib, Y., Ghazal, M., Hajjdiab, H., Fraiwan, L., Shalaby, A., Soliman, A., Mahmoud, A., et al. (2020). A Comprehensive Framework for Differentiating Autism Spectrum Disorder From Neurotypicals by Fusing Structural MRI and Resting State Functional MRI. *Semin Pediatr Neurol* 34: 100805.

Dekhil, O., Ali, M., Shalaby, A., Mahmoud, A., Switala, A., Ghazal, M., Hajidiab, H., Garcia-Zapirain, B., Elmaghraby, A., Keynton, R., et al. (2018). Identifying Personalized Autism Related Impairments Using Resting Functional MRI and ADOS Reports. *Medical Image Computing and Computer Assisted Intervention – MICCAI 2018*: 240-248.

Demirhan, A. (2018). The effect of feature selection on multivariate pattern analysis of structural brain MR images. *Phys Med* 47: 103-111.

Denier, N., Steinberg, G., van Elst, L.T., and Bracht, T. (2022). The role of head circumference and cerebral volumes to phenotype male adults with autism spectrum disorder. *Brain Behav* 12: 2460.

Deshpande, G., Libero, L.E., Sreenivasan, K.R., Deshpande, H.D., and Kana, R.K. (2013). Identification of neural connectivity signatures of autism using machine learning. *Front Hum Neurosci* 7: 670.

Djemal, R., AlSharabi, K., Ibrahim, S., and Alsuwailem, A. (2017). EEG-Based Computer Aided Diagnosis of Autism Spectrum Disorder Using Wavelet, Entropy, and ANN. *Biomed Res Int* 2017.

Dodero, L., Minh, H.Q., Biagio, M.S., Murino, V., and Sona, D. (2015a). Kernel-based classification for brain connectivity graphs on the Riemannian manifold of positive definite matrices. *2015 IEEE 12th International Symposium on Biomedical Imaging (ISBI).* IEEE.

Dodero, L., Sambataro, F., Murino, V., and Sona, D. (2015b). Kernel-Based Analysis of Functional Brain Connectivity on Grassmann Manifold. *Medical Image Computing and Computer-Assisted Intervention – MICCAI 2015*: 604-611.

Dominic, N., Cenggoro, T.W., Budiarto, A., and Pardamean, B. (2021). Transfer learning using inception-ResNet-v2 model to the augmented neuroimages data for autism spectrum disorder classification. *Commun. Math. Biol. Neurosci.* 2021.

Duchesnay, E., Cachia, A., Boddaert, N., Chabane, N., Mangin, J.F., Martinot, J.L., Brunelle, F., and Zilbovicius, M. (2011). Feature selection and classification of imbalanced datasets: application to PET images of children with autistic spectrum disorders. *NeuroImage* 57: 1003-1014.

Duffy, F.H. and Als, H. (2012). A stable pattern of EEG spectral coherence distinguishes children with autism from neuro-typical controls - a large case control study. *BMC Med* 10: 64.

Dvornek, N.C., Ventola, P., Pelphrey, K.A., and Duncan, J.S. (2017). *Machine Learning in Medical Imaging*. Springer International Publishing.

Dvornek, N.C., Yang, D., Ventola, P., and Duncan, J.S. (2018). Learning Generalizable Recurrent Neural Networks from Small Task-fMRI Datasets. *Med Image Comput Comput Assist Interv*: 329-337.

Ecker, C., Marquand, A., Mourao-Miranda, J., Johnston, P., Daly, E.M., Brammer, M.J., Maltezos, S., Murphy, C.M., Robertson, D., Williams, S.C., et al. (2010a). Describing the brain in autism in five dimensions--magnetic resonance imaging-assisted diagnosis of autism spectrum disorder using a multiparameter classification approach. *J Neurosci* 30: 10612-10623.

Ecker, C., Rocha-Rego, V., Johnston, P., Mourao-Miranda, J., Marquand, A., Daly, E.M., Brammer, M.J., Murphy, C., Murphy, D.G., and Consortium, M.A. (2010b). Investigating the predictive value of whole-brain structural MR scans in autism: a pattern classification approach. *NeuroImage* 49: 44-56.

Eill, A., Jahedi, A., Gao, Y., Kohli, J.S., Fong, C.H., Solders, S., Carper, R.A., Valafar, F., Bailey, B.A., and Muller, R.A. (2019). Functional Connectivities Are More Informative Than Anatomical Variables in Diagnostic Classification of Autism. *Brain Connect* 9: 604-612.

Eldridge, J., Lane, A.E., Belkin, M., and Dennis, S. (2014). Robust features for the automatic identification of autism spectrum disorder in children. *J Neurodev Disord* 6: 12.

ElNakieb, Y., Ali, M.T., Elnakib, A., Shalaby, A., Soliman, A., Mahmoud, A., Ghazal, M., Barnes, G.N., and El-Baz, A. (2021). The Role of Diffusion Tensor MR Imaging (DTI) of the Brain in Diagnosing Autism Spectrum Disorder: Promising Results. *Sensors (Basel)* 21: 8171-8171.

Elnakieb, Y.A., Ali, M.T., Soliman, A., Mahmoud, A.H., Shalaby, A.M., Alghamdi, N.S., Ghazal, M., Khalil, A., Switala, A., Keynton, R.S., et al. (2020). Computer Aided Autism Diagnosis Using Diffusion Tensor Imaging. *IEEE Access* 8: 191298-191308.

Emerson, R.W., Adams, C., Nishino, T., Hazlett, H.C., Wolff, J.J., Zwaigenbaum, L., Constantino, J.N., Shen, M.D., Swanson, M.R., Elison, J.T., et al. (2017). Functional neuroimaging of high-risk 6-month-old infants predicts a diagnosis of autism at 24 months of age. *Sci Transl Med* 9: 2882.

Eraslan, S., Yesilada, Y., Yaneva, V., and Harper, S. (2020). Autism detection based on eye movement sequences on the web. *Proceedings of the 17th International Web for All Conference.* New York, NY, USA: ACM.

Eslami, T., Mirjalili, V., Fong, A., Laird, A.R., and Saeed, F. (2019). ASD-DiagNet: A Hybrid Learning Approach for Detection of Autism Spectrum Disorder Using fMRI Data. *Front Neuroinform* 13: 70.

Fan, G., Chen, Y., Chen, Y., Yang, M., Wang, J., Li, C., Li, Y., and Liu, T. (2020). Abnormal Brain Regions in Two-Group Cross-Location Dynamics Model of Autism. *IEEE Access* 8: 94526-94534.

Fan, Z., Su, J., Gao, K., Hu, D., and Zeng, L.-L. (2021). A Federated Deep Learning Framework for 3D Brain MRI Images. *2021 International Joint Conference on Neural Networks (IJCNN).* IEEE.

Ferrari, E., Bosco, P., Calderoni, S., Oliva, P., Palumbo, L., Spera, G., Fantacci, M.E., and Retico, A. (2020). Dealing with confounders and outliers in classification medical studies: The Autism Spectrum Disorders case study. *Artif Intell Med* 108: 101926.

Fredo, A.J., Jahedi, A., Reiter, M., and Müller, R.-A. (2018). Diagnostic classification of autism using resting-state fMRI data and conditional random forest. *40th Annual International Conference of the IEEE Engineering in Medicine and Biology Society.* 2.76 edn. Honolulu, HI, USA: IEEE.

Fu, Y., Zhang, J., Li, Y., Shi, J., Zou, Y., Guo, H., Li, Y., Yao, Z., Wang, Y., and Hu, B. (2021). A novel pipeline leveraging surface-based features of small subcortical structures to classify individuals with autism spectrum disorder. *Prog Neuropsychopharmacol Biol Psychiatry* 104: 109989.

Gao, J., Chen, M., Li, Y., Gao, Y., Li, Y., Cai, S., and Wang, J. (2020). Multisite Autism Spectrum Disorder Classification Using Convolutional Neural Network Classifier and Individual Morphological Brain Networks. *Front Neurosci* 14.

Gao, K., Sun, Y., Niu, S., and Wang, L. (2021). Unified framework for early stage status prediction of autism based on infant structural magnetic resonance imaging. *Autism Res* 14: 2512-2523.

Georges, N., Mhiri, I., and Rekik, I. (2020). Identifying the best data-driven feature selection method for boosting reproducibility in classification tasks. *Pattern Recognit.* 101: 107183-107183.

Germann, J., Gouveia, F.V., Brentani, H., Bedford, S.A., Tullo, S., Chakravarty, M.M., and Devenyi, G.A. (2021). Involvement of the habenula in the pathophysiology of autism spectrum disorder. *Sci Rep* 11: 21168.

Ghiassian, S., Greiner, R., Jin, P., and Brown, M.R. (2016). Using Functional or Structural Magnetic Resonance Images and Personal Characteristic Data to Identify ADHD and Autism. *PLoS One* 11: 0166934.

Ghoreishi, N., Goshvarpour, A., Zare-Molekabad, S., Khorshidi, N., and Baratzade, S. (2021). Classification of autistic children using polar-based lagged state-space indices of EEG signals. *Signal Image Video Process.* 15: 1805-1812.

Goch, C.J., Oztan, B., Stieltjes, B., Henze, R., Hering, J., Poustka, L., Meinzer, H.-P., Yener, B., and Maier-Hein, K.H. (2014). Global Changes in the Connectome in Autism Spectrum Disorders. Springer, *Computational Diffusion MRI and Brain Connectivity*: 239-247.

Gori, I., Giuliano, A., Muratori, F., Saviozzi, I., Oliva, P., Tancredi, R., Cosenza, A., Tosetti, M., Calderoni, S., and Retico, A. (2015). Gray Matter Alterations in Young Children with Autism Spectrum Disorders: Comparing Morphometry at the Voxel and Regional Level. *J Neuroimaging* 25: 866-874.

Gorriz, J.M., Ramirez, J., Segovia, F., Martinez, F.J., Lai, M.C., Lombardo, M.V., Baron-Cohen, S., Consortium, M.A., and Suckling, J. (2019). A Machine Learning Approach to Reveal the NeuroPhenotypes of Autisms. *Int J Neural Syst* 29.

Graa, O. and Rekik, I. (2019). Multi-view learning-based data proliferator for boosting classification using highly imbalanced classes. *J Neurosci Methods* 327: 108344.

Grossi, E., Olivieri, C., and Buscema, M. (2017). Diagnosis of autism through EEG processed by advanced computational algorithms: A pilot study. *Comput Methods Programs Biomed* 142: 73-79.

Gui, A., Bussu, G., Tye, C., Elsabbagh, M., Pasco, G., Charman, T., Johnson, M.H., and Jones, E.J.H. (2021). Attentive brain states in infants with and without later autism. *Transl Psychiatry* 11: 196.

Guo, X., Dominick, K.C., Minai, A.A., Li, H., Erickson, C.A., and Lu, L.J. (2017). Diagnosing Autism Spectrum Disorder from Brain Resting-State Functional Connectivity Patterns Using a Deep Neural Network with a Novel Feature Selection Method. *Front Neurosci* 11: 460.

Guo, X., Wang, J., Wang, X., Liu, W., Yu, H., Xu, L., Li, H., Wu, J., Dong, M., Tan, W., et al. (2022). Diagnosing autism spectrum disorder in children using conventional MRI and apparent diffusion coefficient based deep learning algorithms. *Eur Radiol* 32: 761-770.

Gupta, S., Chan, Y.H., and Rajapakse, J.C. (2021). Obtaining leaner deep neural networks for decoding brain functional connectome in a single shot. *Neurocomputing* 453: 326-336.

Gupta, S., Rajapakse, J.C., Welsch, R.E., and Alzheimer's Disease Neuroimaging, I. (2020). Ambivert degree identifies crucial brain functional hubs and improves detection of Alzheimer's Disease and Autism Spectrum Disorder. *Neuroimage Clin* 25: 102186.

Haar, S., Berman, S., Behrmann, M., and Dinstein, I. (2016). Anatomical Abnormalities in Autism? *Cereb Cortex* 26: 1440-1452.

Haghighat, H., Mirzarezaee, M., Nadjar Araabi, B., and Khadem, A. (2022). An age-dependent Connectivity-based computer aided diagnosis system for Autism Spectrum Disorder using Resting-state fMRI. *Biomed. Signal Process. Control* 71: 103108-103108.

Haputhanthri, D., Brihadiswaran, G., Gunathilaka, S., Meedeniya, D., Jayawardena, Y., Jayarathna, S., and Jaime, M. (2019). An EEG based Channel Optimized Classification Approach for Autism Spectrum Disorder. *2019 Moratuwa Engineering Research Conference (MERCon).* IEEE.

Haweel, R., Dekhil, O., Shalaby, A., Mahmoud, A., Ghazal, M., Khalil, A., Ghoniemy, S., Keynton, R., Elmaghraby, A., Barnes, G., et al. (2019). Functional Magnetic Resonance Imaging Based Framework for Autism Diagnosis. *2019 Fifth International Conference on Advances in Biomedical Engineering (ICABME).* IEEE.

Haweel, R., Seada, N., Ghoniemy, S., Alghamdi, N.S., and El-Baz, A. (2021a). A CNN Deep Local and Global ASD Classification Approach with Continuous Wavelet Transform Using Task-Based FMRI. *Sensors (Basel)* 21: 5822-5822.

Haweel, R., Shalaby, A., Mahmoud, A., Ghazal, M., Seada, N., Ghoniemy, S., Barnes, G., and El-Baz, A. (2021b). A Novel DWT-Based Discriminant Features Extraction From Task-Based Fmri: An Asd Diagnosis Study Using Cnn. *2021 IEEE 18th International Symposium on Biomedical Imaging (ISBI).* IEEE.

Haweel, R., Shalaby, A., Mahmoud, A., Seada, N., Ghoniemy, S., Ghazal, M., Casanova, M.F., Barnes, G.N., and El-Baz, A. (2021c). A robust DWT-CNN-based CAD system for early diagnosis of autism using task-based fMRI. *Med Phys* 48: 2315-2326.

Hazlett, H.C., Gu, H., Munsell, B.C., Kim, S.H., Styner, M., Wolff, J.J., Elison, J.T., Swanson, M.R., Zhu, H., Botteron, K.N., et al. (2017). Early brain development in infants at high risk for autism spectrum disorder. *Nature* 542: 348-351.

Heinsfeld, A.S., Franco, A.R., Craddock, R.C., Buchweitz, A., and Meneguzzi, F. (2018). Identification of autism spectrum disorder using deep learning and the ABIDE dataset. *Neuroimage Clin* 17: 16-23.

Herath, L., Meedeniya, D., Marasingha, M.A.J.C., and Weerasinghe, V. (2021). Autism spectrum disorder diagnosis support model using Inception V3. *2021 International Research Conference on Smart Computing and Systems Engineering (SCSE).* IEEE.

Heunis, T., Aldrich, C., Peters, J.M., Jeste, S.S., Sahin, M., Scheffer, C., and de Vries, P.J. (2018). Recurrence quantification analysis of resting state EEG signals in autism spectrum disorder - a systematic methodological exploration of technical and demographic confounders in the search for biomarkers. *BMC Med* 16: 101.

Hu, J., Cao, L., Li, T., Liao, B., Dong, S., and Li, P. (2020). Interpretable Learning Approaches in Resting-State Functional Connectivity Analysis: The Case of Autism Spectrum Disorder. *Comput Math Methods Med* 2020.

Huang, B. (2021). Diagnosis of autism spectrum disorder by causal influence strength learned from resting-state fMRI data. Elsevier, *Neural Engineering Techniques for Autism Spectrum Disorder*: 237-267.

Huang, F., Elazab, A., OuYang, L., Tan, J., Wang, T., and Lei, B. (2019a). Sparse Low-rank Constrained Adaptive Structure Learning using Multi-template for Autism Spectrum Disorder Diagnosis. *2019 IEEE 16th International Symposium on Biomedical Imaging (ISBI 2019).* IEEE.

Huang, F., Tan, E.L., Yang, P., Huang, S., Ou-Yang, L., Cao, J., Wang, T., and Lei, B. (2020). Self-weighted adaptive structure learning for ASD diagnosis via multi-template multi-center representation. *Med Image Anal* 63: 101662.

Huang, H., Liu, X., Jin, Y., Lee, S.W., Wee, C.Y., and Shen, D. (2019b). Enhancing the representation of functional connectivity networks by fusing multi-view information for autism spectrum disorder diagnosis. *Hum Brain Mapp* 40: 833-854.

Ibrahim, S., Djemal, R., and Alsuwailem, A. (2018). Electroencephalography (EEG) signal processing for epilepsy and autism spectrum disorder diagnosis. *Biocybern. Biomed. Eng.* 38: 16-26.

Iidaka, T. (2015). Resting state functional magnetic resonance imaging and neural network classified autism and control. *Cortex* 63: 55-67.

Ingalhalikar, M., Parker, D., Bloy, L., Roberts, T.P., and Verma, R. (2011). Diffusion based abnormality markers of pathology: toward learned diagnostic prediction of ASD. *NeuroImage* 57: 918-927.

Irimia, A., Lei, X., Torgerson, C.M., Jacokes, Z.J., Abe, S., and Van Horn, J.D. (2018). Support Vector Machines, Multidimensional Scaling and Magnetic Resonance Imaging Reveal Structural Brain Abnormalities Associated With the Interaction Between Autism Spectrum Disorder and Sex. *Front Comput Neurosci* 12: 93.

Itani, S. and Thanou, D. (2021). Combining anatomical and functional networks for neuropathology identification: A case study on autism spectrum disorder. *Med Image Anal* 69: 101986.

Jahedi, A., Nasamran, C.A., Faires, B., Fan, J., and Muller, R.A. (2017). Distributed Intrinsic Functional Connectivity Patterns Predict Diagnostic Status in Large Autism Cohort. *Brain Connect* 7: 515-525.

Jain, S.M. (2018). Detection of Autism using Magnetic Resonance Imaging data and Graph Convolutional Neural Networks. Rochester: Rochester Institute of Technology.

Jamal, W., Das, S., Oprescu, I.A., Maharatna, K., Apicella, F., and Sicca, F. (2014). Classification of autism spectrum disorder using supervised learning of brain connectivity measures extracted from synchrostates. *J Neural Eng* 11: 046019.

Jayawardana, Y., Jaime, M., and Jayarathna, S. (2019). Analysis of Temporal Relationships between ASD and Brain Activity through EEG and Machine Learning. *2019 IEEE 20th International Conference on Information Reuse and Integration for Data Science (IRI).* IEEE.

Jiang, H., Cao, P., Xu, M., Yang, J., and Zaiane, O. (2020). Hi-GCN: A hierarchical graph convolution network for graph embedding learning of brain network and brain disorders prediction. *Comput Biol Med* 127: 104096.

Jiang, M. and Zhao, Q. (2017). Learning Visual Attention to Identify People with Autism Spectrum Disorder. *2017 IEEE International Conference on Computer Vision (ICCV).* IEEE.

Jiao, Y., Chen, R., Ke, X., Chu, K., Lu, Z., and Herskovits, E.H. (2010). Predictive models of autism spectrum disorder based on brain regional cortical thickness. *NeuroImage* 50: 589-599.

Jiao, Z., Li, H., and Fan, Y. (2020). Improving Diagnosis of Autism Spectrum Disorder and Disentangling its Heterogeneous Functional Connectivity Patterns Using Capsule Networks. *2020 IEEE 17th International Symposium on Biomedical Imaging (ISBI).* IEEE.

Jun, E., Kang, E., Choi, J., and Suk, H.I. (2019). Modeling regional dynamics in low-frequency fluctuation and its application to Autism spectrum disorder diagnosis. *NeuroImage* 184: 669-686.

Jun, E. and Suk, H.-I. (2017). *Connectomics in NeuroImaging*. Springer International Publishing.

Jung, M., Tu, Y., Park, J., Jorgenson, K., Lang, C., Song, W., and Kong, J. (2019). Surface-based shared and distinct resting functional connectivity in attention-deficit hyperactivity disorder and autism spectrum disorder. *Br J Psychiatry* 214: 339-344.

Jung, W., Heo, D.-W., Jeon, E., Lee, J., and Suk, H.-I. (2021). Inter-regional High-Level Relation Learning from Functional Connectivity via Self-supervision. *Medical Image Computing and Computer Assisted Intervention – MICCAI 2021*: 284-293.

Just, M.A., Cherkassky, V.L., Buchweitz, A., Keller, T.A., and Mitchell, T.M. (2014). Identifying autism from neural representations of social interactions: neurocognitive markers of autism. *PLoS One* 9: 113879.

K, D. and Murthy Oruganti, V.R. (2021). A Machine Learning Approach for Diagnosing Neurological Disorders using Longitudinal Resting-State fMRI. *2021 11th International Conference on Cloud Computing, Data Science & Engineering (Confluence).* IEEE.

Kam, T.E., Suk, H.I., and Lee, S.W. (2017). Multiple functional networks modeling for autism spectrum disorder diagnosis. *Hum Brain Mapp* 38: 5804-5821.

Kamel, M.I., Alhaddad, M.J., Malibary, H.M., Thabit, K., Dahlwi, F., Alsaggaf, E.A., and Hadi, A.A. (2012). EEG based Autism Diagnosis Using Regularized Fisher Linear Discriminant Analysis. *Int. J. Image Graph. Signal Process.* 4: 35-41.

Kang, J., Han, X., Hu, J.F., Feng, H., and Li, X. (2020a). The study of the differences between low-functioning autistic children and typically developing children in the processing of the own-race and other-race faces by the machine learning approach. *J Clin Neurosci* 81: 54-60.

Kang, J., Han, X., Song, J., Niu, Z., and Li, X. (2020b). The identification of children with autism spectrum disorder by SVM approach on EEG and eye-tracking data. *Comput Biol Med* 120: 103722.

Kang, J., Jin, Y., Liang, G., and Li, X. (2021). Accurate assessment of low-function autistic children based on EEG feature fusion. *J Clin Neurosci* 90: 351-358.

Karampasi, A., Kakkos, I., Miloulis, S.-T., Zorzos, I., Dimitrakopoulos, G.N., Gkiatis, K., Asvestas, P., and Matsopoulos, G. (2020). A Machine Learning fMRI Approach in the Diagnosis of Autism. *2020 IEEE International Conference on Big Data (Big Data).* IEEE.

Karampasi, A.S., Savva, A.D., Korfiatis, V.C., Kakkos, I., and Matsopoulos, G.K. (2021). Informative Biomarkers for Autism Spectrum Disorder Diagnosis in Functional Magnetic Resonance Imaging Data on the Default Mode Network. *Appl. Sci.* 11: 6216-6216.

Kassraian-Fard, P., Matthis, C., Balsters, J.H., Maathuis, M.H., and Wenderoth, N. (2016). Promises, Pitfalls, and Basic Guidelines for Applying Machine Learning Classifiers to Psychiatric Imaging Data, with Autism as an Example. *Front Psychiatry* 7: 177.

Katuwal, G.J., Cahill, N.D., Baum, S.A., and Michael, A.M. (2015). The predictive power of structural MRI in Autism diagnosis. *2015 37th Annual International Conference of the IEEE Engineering in Medicine and Biology Society (EMBC).* IEEE.

Kazeminejad, A. and Sotero, R.C. (2018). Topological Properties of Resting-State fMRI Functional Networks Improve Machine Learning-Based Autism Classification. *Front Neurosci* 12: 1018.

Kazeminejad, A. and Sotero, R.C. (2020). The Importance of Anti-correlations in Graph Theory Based Classification of Autism Spectrum Disorder. *Front Neurosci* 14: 676.

Ke, F., Choi, S., Kang, Y.H., Cheon, K.-A., and Lee, S.W. (2020). Exploring the Structural and Strategic Bases of Autism Spectrum Disorders With Deep Learning. *IEEE Access* 8: 153341-153352.

Kernbach, J.M., Satterthwaite, T.D., Bassett, D.S., Smallwood, J., Margulies, D., Krall, S., Shaw, P., Varoquaux, G., Thirion, B., Konrad, K., et al. (2018). Shared endo-phenotypes of default mode dsfunction in attention deficit/hyperactivity disorder and autism spectrum disorder. *Transl Psychiatry* 8: 133.

Khalaji, E. (2021). A machine learning approach for detecting high-functioning autism using web-based eye-tracking data. Ankara.

Khan, N.A., Waheeb, S.A., Riaz, A., and Shang, X. (2020). A Three-Stage Teacher, Student Neural Networks and Sequential Feed Forward Selection-Based Feature Selection Approach for the Classification of Autism Spectrum Disorder. *Brain Sci* 10: 754-754.

Khazaal Shams, W. and Abdul Rahman, A.W. (2011). Characterizing autistic disorder based on Principle Component Analysis. *2011 IEEE Symposium on Industrial Electronics and Applications.* IEEE.

Khosla, M., Jamison, K., Kuceyeski, A., and Sabuncu, M.R. (2018). 3D Convolutional Neural Networks for Classification of Functional Connectomes. Springer, *Deep Learning in Medical Image Analysis and Multimodal Learning for Clinical Decision Support*: 137-145.

Khosla, Y., Ramachandra, P., and Chaitra, N. (2021). Detection of autistic individuals using facial images and deep learning. *2021 IEEE International Conference on Computation System and Information Technology for Sustainable Solutions (CSITSS).* IEEE.

Kim, J.I., Bang, S., Yang, J.J., Kwon, H., Jang, S., Roh, S., Kim, S.H., Kim, M.J., Lee, H.J., Lee, J.M., et al. (2023). Classification of Preschoolers with Low-Functioning Autism Spectrum Disorder Using Multimodal MRI Data. *J Autism Dev Disord* 53: 25-37.

Kong, Y., Gao, J., Xu, Y., Pan, Y., Wang, J., and Liu, J. (2019). Classification of autism spectrum disorder by combining brain connectivity and deep neural network classifier. *Neurocomputing* 324: 63-68.

Ktena, S.I., Parisot, S., Ferrante, E., Rajchl, M., Lee, M., Glocker, B., and Rueckert, D. (2018). Metric learning with spectral graph convolutions on brain connectivity networks. *NeuroImage* 169: 431-442.

Lange, N., Dubray, M.B., Lee, J.E., Froimowitz, M.P., Froehlich, A., Adluru, N., Wright, B., Ravichandran, C., Fletcher, P.T., Bigler, E.D., et al. (2010). Atypical diffusion tensor hemispheric asymmetry in autism. *Autism Res* 3: 350-358.

Lanka, P., Rangaprakash, D., Dretsch, M.N., Katz, J.S., Denney, T.S., Jr., and Deshpande, G. (2020). Supervised machine learning for diagnostic classification from large-scale neuroimaging datasets. *Brain Imaging Behav* 14: 2378-2416.

Leming, M., Gorriz, J.M., and Suckling, J. (2020). Ensemble Deep Learning on Large, Mixed-Site fMRI Datasets in Autism and Other Tasks. *Int J Neural Syst* 30.

Leming, M.J., Baron-Cohen, S., and Suckling, J. (2021). Single-participant structural similarity matrices lead to greater accuracy in classification of participants than function in autism in MRI. *Mol Autism* 12: 34.

Li, B., Mehta, S., Aneja, D., Foster, C., Ventola, P., Shic, F., and Shapiro, L. (2019a). A Facial Affect Analysis System for Autism Spectrum Disorder. *2019 IEEE International Conference on Image Processing (ICIP).* IEEE.

Li, B., Sharma, A., Meng, J., Purushwalkam, S., and Gowen, E. (2017a). Applying machine learning to identify autistic adults using imitation: An exploratory study. *PLoS One* 12: 182652.

Li, G., Liu, M., Sun, Q., Shen, D., and Wang, L. (2018a). Early Diagnosis of Autism Disease by Multi-channel CNNs. *Mach Learn Med Imaging*: 303-309.

Li, H., Parikh, N.A., and He, L. (2018b). A Novel Transfer Learning Approach to Enhance Deep Neural Network Classification of Brain Functional Connectomes. *Front Neurosci* 12: 491.

Li, J., Qiu, L., Xu, L., Pedapati, E.V., Erickson, C.A., and Sunar, U. (2016). Characterization of autism spectrum disorder with spontaneous hemodynamic activity. *Biomed Opt Express* 7: 3871-3881.

Li, W., Wang, Z., Zhang, L., Qiao, L., and Shen, D. (2017b). Remodeling Pearson's Correlation for Functional Brain Network Estimation and Autism Spectrum Disorder Identification. *Front Neuroinform* 11: 55.

Li, X., Cai, E., Qin, L., and Kang, J. (2018c). [Abnormal electroencephalogram features extraction of autistic children based on wavelet transform combined with empirical modal decomposition]. *Sheng Wu Yi Xue Gong Cheng Xue Za Zhi* 35: 524-529.

Li, X., Dvornek, N.C., Papademetris, X., Zhuang, J., Staib, L.H., Ventola, P., and Duncan, J.S. (2018d). 2-Channel convolutional 3D deep neural network (2CC3D) for fMRI analysis: ASD classification and feature learning. *2018 IEEE 15th International Symposium on Biomedical Imaging (ISBI 2018).* IEEE.

Li, X., Dvornek, N.C., Zhou, Y., Zhuang, J., Ventola, P., and Duncan, J.S. (2019b). Graph Neural Network for Interpreting Task-fMRI Biomarkers. *Med Image Comput Comput Assist Interv*: 485-493.

Li, X., Dvornek, N.C., Zhuang, J., Ventola, P., and Duncan, J.S. (2018e). Brain Biomarker Interpretation in ASD Using Deep Learning and fMRI. *Med Image Comput Comput Assist Interv*: 206-214.

Li, X., Gu, Y., Dvornek, N., Staib, L.H., Ventola, P., and Duncan, J.S. (2020). Multi-site fMRI analysis using privacy-preserving federated learning and domain adaptation: ABIDE results. *Med Image Anal* 65: 101765.

Li, X., Zhou, Y., Dvornek, N., Zhang, M., Gao, S., Zhuang, J., Scheinost, D., Staib, L.H., Ventola, P., and Duncan, J.S. (2021). BrainGNN: Interpretable Brain Graph Neural Network for fMRI Analysis. *Med Image Anal* 74: 102233.

Liang, Y., Liu, B., and Zhang, H. (2021). A Convolutional Neural Network Combined With Prototype Learning Framework for Brain Functional Network Classification of Autism Spectrum Disorder. *IEEE Trans Neural Syst Rehabil Eng* 29: 2193-2202.

Liaqat, S., Wu, C., Duggirala, P.R., Cheung, S.S., Chuah, C.N., Ozonoff, S., and Young, G. (2021). Predicting ASD Diagnosis in Children with Synthetic and Image-based Eye Gaze Data. *Signal Process Image Commun* 94: 116198-116198.

Libero, L.E., DeRamus, T.P., Lahti, A.C., Deshpande, G., and Kana, R.K. (2015). Multimodal neuroimaging based classification of autism spectrum disorder using anatomical, neurochemical, and white matter correlates. *Cortex* 66: 46-59.

Lin, Y., Gu, Y., Xu, Y., Hou, S., Ding, R., and Ni, S. (2022). Autistic spectrum traits detection and early screening: A machine learning based eye movement study. *J Child Adolesc Psychiatr Nurs* 35: 83-92.

Liu, J., Sheng, Y., Lan, W., Guo, R., Wang, Y., and Wang, J. (2020a). Improved ASD classification using dynamic functional connectivity and multi-task feature selection. *Pattern Recognit. Lett.* 138: 82-87.

Liu, S., Ge, F., Zhao, L., Wang, T., Ni, D., and Liu, T. (2022). NAS-optimized topology-preserving transfer learning for differentiating cortical folding patterns. *Med Image Anal* 77: 102316.

Liu, W., Li, M., and Yi, L. (2016). Identifying children with autism spectrum disorder based on their face processing abnormality: A machine learning framework. *Autism Res* 9: 888-898.

Liu, W., Yu, X., Raj, B., Yi, L., Zou, X., and Li, M. (2015). Efficient autism spectrum disorder prediction with eye movement: A machine learning framework. *2015 International Conference on Affective Computing and Intelligent Interaction (ACII).* IEEE.

Liu, W., Zhou, T., Zhang, C., Zou, X., and Li, M. (2017). Response to name: A dataset and a multimodal machine learning framework towards autism study. *2017 Seventh International Conference on Affective Computing and Intelligent Interaction (ACII).* IEEE.

Liu, Y., Xu, L., Li, J., Yu, J., and Yu, X. (2020b). Attentional Connectivity-based Prediction of Autism Using Heterogeneous rs-fMRI Data from CC200 Atlas. *Exp Neurobiol* 29: 27-37.

Liu, Y., Xu, L., Yu, J., Li, J., and Yu, X. (2021). Identification of autism spectrum disorder using multi-regional resting-state data through an attention learning approach. *Biomed. Signal Process. Control* 69: 102833-102833.

Lu, A. and Perkowski, M. (2021). Deep Learning Approach for Screening Autism Spectrum Disorder in Children with Facial Images and Analysis of Ethnoracial Factors in Model Development and Application. *Brain Sci* 11: 1446-1446.

Lu, P., Li, X., Hu, L., and Lu, L. (2021). Integrating genomic and resting State fMRI for efficient autism spectrum disorder classification. *Multimed. Tools Appl.* 81: 19183-19194.

M, K. and Jaganathan, S. (2021). Graph Convolutional Model to Diagnose Autism Spectrum Disorder Using Rs-Fmri Data. *2021 5th International Conference on Computer, Communication and Signal Processing (ICCCSP).* IEEE.

Ma, X., Wang, X.H., and Li, L. (2021). Identifying individuals with autism spectrum disorder based on the principal components of whole-brain phase synchrony. *Neurosci Lett* 742: 135519.

Madine, M., Rekik, I., and Werghi, N. (2020). Diagnosing Autism Using T1-W MRI With Multi-Kernel Learning and Hypergraph Neural Network. *2020 IEEE International Conference on Image Processing (ICIP).* IEEE.

Maenner, M.J., Yeargin-Allsopp, M., Van Naarden Braun, K., Christensen, D.L., and Schieve, L.A. (2016). Development of a Machine Learning Algorithm for the Surveillance of Autism Spectrum Disorder. *PLoS One* 11: 168224.

Mahanand, B.S., Vigneshwaran, S., Suresh, S., and Sundararajan, N. (2016). An enhanced effect-size thresholding method for the diagnosis of Autism Spectrum Disorder using resting state functional MRI. *2016 Second International Conference on Cognitive Computing and Information Processing (CCIP).* IEEE.

Mahmoud, A., Karamti, H., and Alrowais, F. (2020). An Effective Sparse Autoencoders based Deep Learning Framework for fMRI Scans Classification. *Proceedings of the 22nd International Conference on Enterprise Information Systems.* SCITEPRESS - Science and Technology Publications.

Mahmoud, A.M. and Karamti, H. (2021). Classifying a type of brain disorder in children: an effective fMRI based deep attempt. *Indones. J. Electr. Eng. Comput. Sci.* 22: 260-260.

Manoharan, T.A. and Radhakrishnan, M. (2021). Region-Wise Brain Response Classification of ASD Children Using EEG and BiLSTM RNN. *Clin EEG Neurosci*.

Mhiri, I. and Rekik, I. (2020). Joint functional brain network atlas estimation and feature selection for neurological disorder diagnosis with application to autism. *Med Image Anal* 60: 101596.

Mishra, M. and Pati, U.C. (2021). Autism Spectrum Disorder Detection using Surface Morphometric Feature of sMRI in Machine Learning. *2021 8th International Conference on Smart Computing and Communications (ICSCC).* IEEE.

Mohi-Ud-Din, Q. and Jayanthy, A.K. (2021). EEG feature extraction using wavelet transform for classifying autism spectrum disorder. *Mater. Today.*

Mostafa, S., Tang, L., and Wu, F.-X. (2019). Diagnosis of Autism Spectrum Disorder Based on Eigenvalues of Brain Networks. *IEEE Access* 7: 128474-128486.

Mostapha, M., Casanova, M.F., Gimel’farb, G., and El-Baz, A. (2015). Towards Non-invasive Image-Based Early Diagnosis of Autism. *Medical Image Computing and Computer-Assisted Intervention -- MICCAI 2015*: 160-168.

Mujeeb Rahman, K.K. and Subashini, M.M. (2022). Identification of Autism in Children Using Static Facial Features and Deep Neural Networks. *Brain Sci* 12: 94-94.

Murdaugh, D.L., Shinkareva, S.V., Deshpande, H.R., Wang, J., Pennick, M.R., and Kana, R.K. (2012). Differential deactivation during mentalizing and classification of autism based on default mode network connectivity. *PLoS One* 7: 50064.

Naghashzadeh, M., Yazdi, M., and Zolghadrasli, A. (2021). Classification of autism spectrum disorders individuals and controls using phase and envelope features from resting-state fMRI data. *Computer Methods in Biomechanics and Biomedical Engineering: Imaging & Visualization* 10: 55-66.

Nielsen, J.A., Zielinski, B.A., Fletcher, P.T., Alexander, A.L., Lange, N., Bigler, E.D., Lainhart, J.E., and Anderson, J.S. (2013). Multisite functional connectivity MRI classification of autism: ABIDE results. *Front Hum Neurosci* 7: 599.

Niu, K., Guo, J., Pan, Y., Gao, X., Peng, X., Li, N., and Li, H. (2020). Multichannel Deep Attention Neural Networks for the Classification of Autism Spectrum Disorder Using Neuroimaging and Personal Characteristic Data. *Complexity* 2020: 1-9.

Nur Syahindah Husna, R., Syafeeza, A.R., Abdul Hamid, N., Wong, Y.C., and Atikah Raihan, R. (2021). Functional Magnetic Resonance Imaging for Autism Spectrum Disorder Detection Using Deep Learning. *J. Teknol.* 83: 45-52.

Odriozola, P., Uddin, L.Q., Lynch, C.J., Kochalka, J., Chen, T., and Menon, V. (2016). Insula response and connectivity during social and non-social attention in children with autism. *Soc Cogn Affect Neurosci* 11: 433-444.

Okamoto, N. and Akama, H. (2021). Extended Invariant Information Clustering Is Effective for Leave-One-Site-Out Cross-Validation in Resting State Functional Connectivity Modeling. *Front Neuroinform* 15.

Oliveira, J.S., Franco, F.O., Revers, M.C., Silva, A.F., Portolese, J., Brentani, H., Machado-Lima, A., and Nunes, F.L.S. (2021). Computer-aided autism diagnosis based on visual attention models using eye tracking. *Sci Rep* 11: 10131.

Ozdemir, S., Akin-Bulbul, I., Kok, I., and Ozdemir, S. (2022). Development of a visual attention based decision support system for autism spectrum disorder screening. *Int J Psychophysiol* 173: 69-81.

Parisot, S., Ktena, S.I., Ferrante, E., Lee, M., Guerrero, R., Glocker, B., and Rueckert, D. (2018). Disease prediction using graph convolutional networks: Application to Autism Spectrum Disorder and Alzheimer's disease. *Med Image Anal* 48: 117-130.

Parisot, S., Ktena, S.I., Ferrante, E., Lee, M., Moreno, R.G., Glocker, B., and Rueckert, D. (2017). Spectral Graph Convolutions for Population-Based Disease Prediction. Springer, *Medical Image Computing and Computer Assisted Intervention − MICCAI 2017*: 177-185.

Payabvash, S., Palacios, E.M., Owen, J.P., Wang, M.B., Tavassoli, T., Gerdes, M., Brandes-Aitken, A., Cuneo, D., Marco, E.J., and Mukherjee, P. (2019). White Matter Connectome Edge Density in Children with Autism Spectrum Disorders: Potential Imaging Biomarkers Using Machine-Learning Models. *Brain Connect* 9: 209-220.

Pham, T.H., Vicnesh, J., Wei, J.K.E., Oh, S.L., Arunkumar, N., Abdulhay, E.W., Ciaccio, E.J., and Acharya, U.R. (2020). Autism Spectrum Disorder Diagnostic System Using HOS Bispectrum with EEG Signals. *Int J Environ Res Public Health* 17: 971-971.

Pinaya, W.H.L., Mechelli, A., and Sato, J.R. (2019). Using deep autoencoders to identify abnormal brain structural patterns in neuropsychiatric disorders: A large-scale multi-sample study. *Hum Brain Mapp* 40: 944-954.

Plitt, M., Barnes, K.A., and Martin, A. (2015). Functional connectivity classification of autism identifies highly predictive brain features but falls short of biomarker standards. *Neuroimage Clin* 7: 359-366.

Price, T., Wee, C.-Y., Gao, W., and Shen, D. (2014). Multiple-Network Classification of Childhood Autism Using Functional Connectivity Dynamics. Springer, *International Conference on Medical Image Computing and Computer-Assisted Intervention*: 177-184.

Pua, E.P.K., Ball, G., Adamson, C., Bowden, S., and Seal, M.L. (2019). Quantifying individual differences in brain morphometry underlying symptom severity in Autism Spectrum Disorders. *Sci Rep* 9: 9898.

Rabany, L., Brocke, S., Calhoun, V.D., Pittman, B., Corbera, S., Wexler, B.E., Bell, M.D., Pelphrey, K., Pearlson, G.D., and Assaf, M. (2019). Dynamic functional connectivity in schizophrenia and autism spectrum disorder: Convergence, divergence and classification. *Neuroimage Clin* 24: 101966.

Radhakrishnan, M., Ramamurthy, K., Choudhury, K.K., Won, D., and Manoharan, T.A. (2021). Performance Analysis of Deep Learning Models for Detection of Autism Spectrum Disorder from EEG Signals. *Trait. du Signal* 38: 853-863.

Rahman, S., Rahman, S., Shahid, O., Abdullah, M.T., and Sourov, J.A. (2021). Classifying Eye-Tracking Data Using Saliency Maps. *2020 25th International Conference on Pattern Recognition (ICPR).* IEEE.

Rakhimberdina, Z., Liu, X., and Murata, A.T. (2020). Population Graph-Based Multi-Model Ensemble Method for Diagnosing Autism Spectrum Disorder. *Sensors (Basel)* 20: 6001-6001.

Rakic, M., Cabezas, M., Kushibar, K., Oliver, A., and Llado, X. (2020). Improving the detection of autism spectrum disorder by combining structural and functional MRI information. *Neuroimage Clin* 25: 102181.

Ram Arumugam, S., Ganesh Karuppasamy, S., Gowr, S., Manoj, O., and Kalaivani, K. (2021). A Deep Convolutional Neural Network based Detection System for Autism Spectrum Disorder in Facial images. *2021 Fifth International Conference on I-SMAC (IoT in Social, Mobile, Analytics and Cloud) (I-SMAC).* IEEE.

Rane, S., Jolly, E., Park, A., Jang, H., and Craddock, C. (2017). Developing predictive imaging biomarkers using whole-brain classifiers: Application to the ABIDE I dataset. *Res. Ideas Outcomes* 3: 12733-e12733.

Ranjani, M. and Supraja, P. (2021). Classifying the Autism and Epilepsy Disorder Based on EEG Signal Using Deep Convolutional Neural Network (DCNN). *2021 International Conference on Advance Computing and Innovative Technologies in Engineering (ICACITE).* IEEE.

Rathore, A., Palande, S., Anderson, J.S., Zielinski, B.A., Fletcher, P.T., and Wang, B. (2019). Autism Classification Using Topological Features and Deep Learning: A Cautionary Tale. *Med Image Comput Comput Assist Interv*: 736-744.

Razali, N. and Wahab, A. (2011). 2D affective space model (ASM) for detecting autistic children. *2011 IEEE 15th International Symposium on Consumer Electronics (ISCE).* IEEE.

Reiter, M.A., Jahedi, A., Jac Fredo, A.R., Fishman, I., Bailey, B., and Muller, R.A. (2021). Performance of machine learning classification models of autism using resting-state fMRI is contingent on sample heterogeneity. *Neural Comput Appl* 33: 3299-3310.

Ruan, M. (2020). Image and Video-Based Autism Spectrum Disorder Detection via Deep Learning. Morgantown, West Virginia: West Virginia University.

Sabuncu, M.R., Konukoglu, E., and Alzheimer's Disease Neuroimaging, I. (2015). Clinical prediction from structural brain MRI scans: a large-scale empirical study. *Neuroinformatics* 13: 31-46.

Sadeghi, M., Khosrowabadi, R., Bakouie, F., Mahdavi, H., Eslahchi, C., and Pouretemad, H. (2017). Screening of autism based on task-free fMRI using graph theoretical approach. *Psychiatry Res Neuroimaging* 263: 48-56.

Sadik, R., Anwar, S., and Reza, M.L. (2021). AutismNet: Recognition of Autism Spectrum Disorder from Facial Expressions using MobileNet Architecture. *Int. J. Adv. Trends Com. Sci. Eng.* 10: 327-334.

Sadiq, A., Al-Hiyali, M.I., Yahya, N., Tang, T.B., and Khan, D.M. (2022). Non-Oscillatory Connectivity Approach for Classification of Autism Spectrum Disorder Subtypes Using Resting-State fMRI. *IEEE Access* 10: 14049-14061.

Salehi, F., Jaloli, M., Coben, R., and Nasrabadi, A.M. (2022). Estimating brain effective connectivity from EEG signals of patients with autism disorder and healthy individuals by reducing volume conduction effect. *Cogn Neurodyn* 16: 519-529.

Salekin, A. and Russo, N. (2021). Understanding autism. *Proceedings of the Workshop on Medical Cyber Physical Systems and Internet of Medical Things.* New York, NY, USA: ACM.

Sandeep, P.V.K. and Kumar, N.S. (2021). Autism Detection in Children with Facial Cues using Dense Net Deep Learning Architecture. *Des. Eng.* 2021: 7506-7520.

Sartipi, S., Shayesteh, M.G., and Kalbkhani, H. (2018). Diagnosing of Autism Spectrum Disorder based on GARCH Variance Series for rs-fMRI data. *2018 9th International Symposium on Telecommunications (IST).* IEEE.

Satheesh Kumar, N., Mohanalin, J., and Mahil, J. (2018). RETRACTED ARTICLE: Recognition of autism in children via electroencephalogram behaviour using particle swarm optimization based ANFIS classifier. *Multimed. Tools Appl.* 79: 8747-8766.

Sato, W., Kochiyama, T., Uono, S., Yoshimura, S., Kubota, Y., Sawada, R., Sakihama, M., and Toichi, M. (2017). Reduced Gray Matter Volume in the Social Brain Network in Adults with Autism Spectrum Disorder. *Front Hum Neurosci* 11: 395.

Savva, A.D., Karampasi, A.S., and Matsopoulos, G.K. (2020). Deriving resting-state fMRI biomarkers for classification of autism spectrum disorder. Elsevier, *Autism 360°*: 101-123.

Schirmer, M.D., Venkataraman, A., Rekik, I., Kim, M., Mostofsky, S.H., Nebel, M.B., Rosch, K., Seymour, K., Crocetti, D., Irzan, H., et al. (2021). Neuropsychiatric disease classification using functional connectomics - results of the connectomics in neuroimaging transfer learning challenge. *Med Image Anal* 70: 101972.

Segovia, F., Holt, R., Spencer, M., Gorriz, J.M., Ramirez, J., Puntonet, C.G., Phillips, C., Chura, L., Baron-Cohen, S., and Suckling, J. (2014). Identifying endophenotypes of autism: a multivariate approach. *Front Comput Neurosci* 8: 60.

Sen, B., Borle, N.C., Greiner, R., and Brown, M.R.G. (2018). A general prediction model for the detection of ADHD and Autism using structural and functional MRI. *PLoS One* 13: 194856.

Sewani, H. and Kashef, R. (2020). An Autoencoder-Based Deep Learning Classifier for Efficient Diagnosis of Autism. *Children (Basel)* 7: 182-182.

Shahamat, H. and Saniee Abadeh, M. (2020). Brain MRI analysis using a deep learning based evolutionary approach. *Neural Netw* 126: 218-234.

Shao, L., Fu, C., You, Y., and Fu, D. (2021). Classification of ASD based on fMRI data with deep learning. *Cogn Neurodyn* 15: 961-974.

Sharif, H. and Khan, R.A. (2021). A Novel Machine Learning Based Framework for Detection of Autism Spectrum Disorder (ASD). *Applied Artificial Intelligence* 36.

Sheikhani, A., Behnam, H., Mohammadi, M.R., Noroozian, M., and Golabi, P. (2007). Analysis of quantitative Electroencephalogram background activity in Autism disease patients with Lempel-Ziv complexity and Short Time Fourier Transform measure. *2007 4th IEEE/EMBS International Summer School and Symposium on Medical Devices and Biosensors.* IEEE.

Sheikhani, A., Behnam, H., Mohammadi, M.R., Noroozian, M., and Mohammadi, M. (2012). Detection of abnormalities for diagnosing of children with autism disorders using of quantitative electroencephalography analysis. *J Med Syst* 36: 957-963.

Sheikhani, A., Behnam, H., Noroozian, M., Mohammadi, M.R., and Mohammadi, M. (2009). Abnormalities of quantitative electroencephalography in children with Asperger disorder in various conditions. *Res. Autism Spectr. Disord.* 3: 538-546.

Sherkatghanad, Z., Akhondzadeh, M., Salari, S., Zomorodi-Moghadam, M., Abdar, M., Acharya, U.R., Khosrowabadi, R., and Salari, V. (2019). Automated Detection of Autism Spectrum Disorder Using a Convolutional Neural Network. *Front Neurosci* 13: 1325.

Shi, C., Zhang, J., and Wu, X. (2020). An fMRI Feature Selection Method Based on a Minimum Spanning Tree for Identifying Patients with Autism. *Symmetry* 12: 1995-1995.

Shrivastava, S., Mishra, U., Singh, N., Chandra, A., and Verma, S. (2020). Control or Autism - Classification using Convolutional Neural Networks on Functional MRI. *2020 11th International Conference on Computing, Communication and Networking Technologies (ICCCNT).* IEEE.

Song, D.Y., Topriceanu, C.C., Ilie-Ablachim, D.C., Kinali, M., and Bisdas, S. (2021). Machine learning with neuroimaging data to identify autism spectrum disorder: a systematic review and meta-analysis. *Neuroradiology* 63: 2057-2072.

Song, Y., Epalle, T.M., and Lu, H. (2019). Characterizing and Predicting Autism Spectrum Disorder by Performing Resting-State Functional Network Community Pattern Analysis. *Front Hum Neurosci* 13: 203.

Soussia, M. and Rekik, I. (2018). Unsupervised Manifold Learning Using High-Order Morphological Brain Networks Derived From T1-w MRI for Autism Diagnosis. *Front Neuroinform* 12: 70.

Spera, G., Retico, A., Bosco, P., Ferrari, E., Palumbo, L., Oliva, P., Muratori, F., and Calderoni, S. (2019). Evaluation of Altered Functional Connections in Male Children With Autism Spectrum Disorders on Multiple-Site Data Optimized With Machine Learning. *Front Psychiatry* 10: 620.

Squarcina, L., Nosari, G., Marin, R., Castellani, U., Bellani, M., Bonivento, C., Fabbro, F., Molteni, M., and Brambilla, P. (2021). Automatic classification of autism spectrum disorder in children using cortical thickness and support vector machine. *Brain Behav* 11: 2238.

Subbaraju, V., Sundaram, S., and Narasimhan, S. (2018). Identification of lateralized compensatory neural activities within the social brain due to autism spectrum disorder in adolescent males. *Eur J Neurosci* 47: 631-642.

Subbaraju, V., Sundaram, S., Narasimhan, S., and Suresh, M.B. (2015). Accurate detection of autism spectrum disorder from structural MRI using extended metacognitive radial basis function network. *Expert Syst. Appl.* 42: 8775-8790.

Subbaraju, V., Suresh, M.B., Sundaram, S., and Narasimhan, S. (2017). Identifying differences in brain activities and an accurate detection of autism spectrum disorder using resting state functional-magnetic resonance imaging : A spatial filtering approach. *Med Image Anal* 35: 375-389.

Subudhi, A.K., Mohanty, M., Sahoo, S.K., Mohanty, S.K., and Mohanty, B. (2020). Automated Delimitation and Classification of Autistic Disorder Using EEG Signal. *IETE J. Res.* 69: 951-959.

Sun, J.W., Fan, R., Wang, Q., Wang, Q.Q., Jia, X.Z., and Ma, H.B. (2021). Identify abnormal functional connectivity of resting state networks in Autism spectrum disorder and apply to machine learning-based classification. *Brain Res* 1757: 147299.

Syed, M.A., Yang, Z., Hu, X.P., and Deshpande, G. (2017). Investigating Brain Connectomic Alterations in Autism Using the Reproducibility of Independent Components Derived from Resting State Functional MRI Data. *Front Neurosci* 11: 459.

Tang, M., Kumar, P., Chen, H., and Shrivastava, A. (2020). Deep Multimodal Learning for the Diagnosis of Autism Spectrum Disorder. *J Imaging* 6: 47-47.

Tariq, Q., Daniels, J., Schwartz, J.N., Washington, P., Kalantarian, H., and Wall, D.P. (2018). Mobile detection of autism through machine learning on home video: A development and prospective validation study. *PLoS Med* 15.

Tawhid, M.N.A., Siuly, S., and Wang, H. (2020). Diagnosis of autism spectrum disorder from EEG using a time–frequency spectrogram image‐based approach. *Electron. Lett.* 56: 1372-1375.

Tejwani, R., Liska, A., You, H., Reinen, J., and Das, P. (2017). Autism Classification Using Brain Functional Connectivity Dynamics and Machine Learning. *ArXiv.org*.

Thapaliya, S., Jayarathna, S., and Jaime, M. (2018). Evaluating the EEG and Eye Movements for Autism Spectrum Disorder. *2018 IEEE International Conference on Big Data (Big Data).* IEEE.

Thomas, R.M., Gallo, S., Cerliani, L., Zhutovsky, P., El-Gazzar, A., and van Wingen, G. (2020). Classifying Autism Spectrum Disorder Using the Temporal Statistics of Resting-State Functional MRI Data With 3D Convolutional Neural Networks. *Front Psychiatry* 11: 440.

Tolan, E. and Isik, Z. (2018). Graph Theory Based Classification of Brain Connectivity Network for Autism Spectrum Disorder. *Bioinformatics and Biomedical Engineering*: 520-530.

Tummala, S. (2021). Deep Learning Framework using Siamese Neural Network for Diagnosis of Autism from Brain Magnetic Resonance Imaging. *2021 6th International Conference for Convergence in Technology (I2CT).* IEEE.

Uddin, L.Q., Menon, V., Young, C.B., Ryali, S., Chen, T., Khouzam, A., Minshew, N.J., and Hardan, A.Y. (2011). Multivariate searchlight classification of structural magnetic resonance imaging in children and adolescents with autism. *Biol Psychiatry* 70: 833-841.

Uddin, L.Q., Supekar, K., Lynch, C.J., Khouzam, A., Phillips, J., Feinstein, C., Ryali, S., and Menon, V. (2013). Salience network-based classification and prediction of symptom severity in children with autism. *JAMA Psychiatry* 70: 869-879.

Vabalas, A., Gowen, E., Poliakoff, E., and Casson, A.J. (2020). Applying Machine Learning to Kinematic and Eye Movement Features of a Movement Imitation Task to Predict Autism Diagnosis. *Sci Rep* 10: 8346.

Varol, E., Gaonkar, B., Erus, G., Schultz, R., and Davatzikos, C. (2012). Feature ranking based nested support vector machine ensemble for medical image classification. *2012 9th IEEE International Symposium on Biomedical Imaging (ISBI).* IEEE.

Vigneshwaran, S., Mahanand, B.S., Suresh, S., and Savitha, R. (2013). Autism spectrum disorder detection using projection based learning meta-cognitive RBF network. *The 2013 International Joint Conference on Neural Networks (IJCNN).* IEEE.

Vigneshwaran, S., Mahanand, B.S., Suresh, S., and Sundararajan, N. (2015). Using regional homogeneity from functional MRI for diagnosis of ASD among males. *2015 International Joint Conference on Neural Networks (IJCNN).* IEEE.

Wadhera, T. and Kakkar, D. (2021). Social cognition and functional brain network in autism spectrum disorder: Insights from EEG graph-theoretic measures. *Biomed. Signal Process. Control* 67: 102556-102556.

Wan, G., Kong, X., Sun, B., Yu, S., Tu, Y., Park, J., Lang, C., Koh, M., Wei, Z., Feng, Z., et al. (2019). Applying Eye Tracking to Identify Autism Spectrum Disorder in Children. *J Autism Dev Disord* 49: 209-215.

Wang, C., Xiao, Z., Wang, B., and Wu, J. (2019a). Identification of Autism Based on SVM-RFE and Stacked Sparse Auto-Encoder. *IEEE Access* 7: 118030-118036.

Wang, C., Xiao, Z., and Wu, J. (2019b). Functional connectivity-based classification of autism and control using SVM-RFECV on rs-fMRI data. *Phys Med* 65: 99-105.

Wang, H., Chen, C., and Fushing, H. (2012). Extracting multiscale pattern information of fMRI based functional brain connectivity with application on classification of autism spectrum disorders. *PLoS One* 7: 45502.

Wang, J., Wang, Q., Wang, S., and Shen, D. (2017). Sparse Multi-view Task-Centralized Learning for ASD Diagnosis. *Mach Learn Med Imaging*: 159-167.

Wang, J., Wang, Q., Zhang, H., Chen, J., Wang, S., and Shen, D. (2019c). Sparse Multiview Task-Centralized Ensemble Learning for ASD Diagnosis Based on Age- and Sex-Related Functional Connectivity Patterns. *IEEE Trans Cybern* 49: 3141-3154.

Wang, L., Wee, C.Y., Tang, X., Yap, P.T., and Shen, D. (2016). Multi-task feature selection via supervised canonical graph matching for diagnosis of autism spectrum disorder. *Brain Imaging Behav* 10: 33-40.

Wang, M., Zhang, D., Huang, J., Shen, D., and Liu, M. (2018). Low-Rank Representation for Multi-center Autism Spectrum Disorder Identification. *Med Image Comput Comput Assist Interv*: 647-654.

Wang, Y., Liu, J., Xiang, Y., Wang, J., Chen, Q., and Chong, J. (2022). MAGE: Automatic diagnosis of autism spectrum disorders using multi-atlas graph convolutional networks and ensemble learning. *Neurocomputing* 469: 346-353.

Wang, Y., Wang, J., Wu, F.X., Hayrat, R., and Liu, J. (2020). AIMAFE: Autism spectrum disorder identification with multi-atlas deep feature representation and ensemble learning. *J Neurosci Methods* 343: 108840.

Wee, C.Y., Wang, L., Shi, F., Yap, P.T., and Shen, D. (2014). Diagnosis of autism spectrum disorders using regional and interregional morphological features. *Hum Brain Mapp* 35: 3414-3430.

Wee, C.Y., Yap, P.T., and Shen, D. (2016). Diagnosis of Autism Spectrum Disorders Using Temporally Distinct Resting-State Functional Connectivity Networks. *CNS Neurosci Ther* 22: 212-219.

Wu, C., Liaqat, S., Helvaci, H., Chcung, S.-c.S., Chuah, C.-N., Ozonoff, S., and Young, G. (2021). Machine Learning Based Autism Spectrum Disorder Detection from Videos. *2020 IEEE International Conference on E-health Networking, Application & Services (HEALTHCOM).* IEEE.

Xiao, Z., Wang, C., Jia, N., and Wu, J. (2018). SAE-based classification of school-aged children with autism spectrum disorders using functional magnetic resonance imaging. *Multimed. Tools Appl.* 77: 22809-22820.

Xiao, Z., Wu, J., Wang, C., Jia, N., and Yang, X. (2019). Computer-aided diagnosis of school-aged children with ASD using full frequency bands and enhanced SAE: A multi-institution study. *Exp Ther Med* 17: 4055-4063.

Xing, X., Ji, J., and Yao, Y. (2018). Convolutional Neural Network with Element-wise Filters to Extract Hierarchical Topological Features for Brain Networks. *2018 IEEE International Conference on Bioinformatics and Biomedicine (BIBM).* IEEE.

Xu, G. and Liang, Y. (2021). A Novel Two-stage Prediction Model to Classify Functional Connectivity for Brain Disease Diagnosis. *2021 IEEE 4th International Conference on Computer and Communication Engineering Technology (CCET).* IEEE.

Xu, L., Geng, X., He, X., Li, J., and Yu, J. (2019). Prediction in Autism by Deep Learning Short-Time Spontaneous Hemodynamic Fluctuations. *Front Neurosci* 13: 1120.

Xu, L., Liu, Y., Yu, J., Li, X., Yu, X., Cheng, H., and Li, J. (2020). Characterizing autism spectrum disorder by deep learning spontaneous brain activity from functional near-infrared spectroscopy. *J Neurosci Methods* 331: 108538.

Yahata, N., Morimoto, J., Hashimoto, R., Lisi, G., Shibata, K., Kawakubo, Y., Kuwabara, H., Kuroda, M., Yamada, T., Megumi, F., et al. (2016). A small number of abnormal brain connections predicts adult autism spectrum disorder. *Nat Commun* 7: 11254.

Yamagata, B., Itahashi, T., Fujino, J., Ohta, H., Nakamura, M., Kato, N., Mimura, M., Hashimoto, R.I., and Aoki, Y. (2019). Machine learning approach to identify a resting-state functional connectivity pattern serving as an endophenotype of autism spectrum disorder. *Brain Imaging Behav* 13: 1689-1698.

Yaneva, V., Ha, L.A., Eraslan, S., Yesilada, Y., and Mitkov, R. (2018). Detecting Autism Based on Eye-Tracking Data from Web Searching Tasks. *Proceedings of the 15th International Web for All Conference.* New York, NY, USA: ACM.

Yaneva, V., Ha, L.A., Eraslan, S., Yesilada, Y., and Mitkov, R. (2020). Detecting High-Functioning Autism in Adults Using Eye Tracking and Machine Learning. *IEEE Trans Neural Syst Rehabil Eng* 28: 1254-1261.

Yang, C., Wang, P., Tan, J., Liu, Q., and Li, X. (2021a). Autism spectrum disorder diagnosis using graph attention network based on spatial-constrained sparse functional brain networks. *Comput Biol Med* 139: 104963.

Yang, M., Cao, M., Chen, Y., Chen, Y., Fan, G., Li, C., Wang, J., and Liu, T. (2021b). Large-Scale Brain Functional Network Integration for Discrimination of Autism Using a 3-D Deep Learning Model. *Front Hum Neurosci* 15.

Yang, R., Ke, F., Liu, H., Zhou, M., and Cao, H.-M. (2021c). Exploring sMRI Biomarkers for Diagnosis of Autism Spectrum Disorders Based on Multi Class Activation Mapping Models. *IEEE Access* 9: 124122-124131.

Yang, X., Islam, M.S., and Khaled, A.M.A. (2019). Functional connectivity magnetic resonance imaging classification of autism spectrum disorder using the multisite ABIDE dataset. *2019 IEEE EMBS International Conference on Biomedical & Health Informatics (BHI).* IEEE.

Yang, X., T, P., and Zhang, N. (2020). A Deep Neural Network Study of the ABIDE Repository on Autism Spectrum Classification. *Int. J. Adv. Comput. Sci. Appl.* 11: 1-6.

Yao, D., Liu, M., Wang, M., Lian, C., Wei, J., Sun, L., Sui, J., and Shen, D. (2019). Triplet Graph Convolutional Network for Multi-scale Analysis of Functional Connectivity Using Functional MRI. *Graph Learning in Medical Imaging*: 70-78.

Yin, W., Mostafa, S., and Wu, F.X. (2021). Diagnosis of Autism Spectrum Disorder Based on Functional Brain Networks with Deep Learning. *J Comput Biol* 28: 146-165.

You, Y., Liu, H., Zhang, S., and Shao, L. (2020). Classification of Autism Based on fMRI Data with Feature-Fused Convolutional Neural Network. *Cyberspace Data and Intelligence, and Cyber-Living, Syndrome, and Health*: 77-88.

Zhang, F., Savadjiev, P., Cai, W., Song, Y., Rathi, Y., Tunc, B., Parker, D., Kapur, T., Schultz, R.T., Makris, N., et al. (2018). Whole brain white matter connectivity analysis using machine learning: An application to autism. *NeuroImage* 172: 826-837.

Zhang, F., Savadjiev, P., Cai, W., Song, Y., Verma, R., Westin, C.-F., and O'Donnell, L.J. (2016). Fiber clustering based white matter connectivity analysis for prediction of Autism Spectrum Disorder using diffusion tensor imaging. *2016 IEEE 13th International Symposium on Biomedical Imaging (ISBI).* IEEE.

Zhang, J., Feng, F., Han, T., Gong, X., and Duan, F. (2022). Detection of Autism Spectrum Disorder using fMRI Functional Connectivity with Feature Selection and Deep Learning. *Cognit. Comput.*

Zhang, L., Wang, J.-R., and Ma, Y. (2021a). Graph Convolutional Networks via Low-Rank Subspace for Multi-Site rs-fMRI ASD Diagnosis. *2021 14th International Congress on Image and Signal Processing, BioMedical Engineering and Informatics (CISP-BMEI).* IEEE.

Zhang, S., Chen, D., Tang, Y., and Zhang, L. (2021b). Children ASD Evaluation Through Joint Analysis of EEG and Eye-Tracking Recordings With Graph Convolution Network. *Front Hum Neurosci* 15.

Zhang, X., Ding, X., Wu, Z., Xia, J., Ni, H., Xu, X., Liao, L., Wang, L., and Li, G. (2020). Siamese Verification Framework for Autism Identification During Infancy Using Cortical Path Signature Features. *2020 IEEE 17th International Symposium on Biomedical Imaging (ISBI).* IEEE.

Zhang, Y., Peng, B., Xue, Z., Bao, J., Li, B.K., Liu, Y., Liu, Y., Sheng, M., Pang, C., and Dai, Y. (2021c). Self-Paced Learning and Privileged Information based Cascaded Multi-column Classification algorithm for ASD diagnosis. *2021 43rd Annual International Conference of the IEEE Engineering in Medicine & Biology Society (EMBC).* IEEE.

Zhang, Z. and Zheng, W. (2020). The Discriminative Power of White Matter Microstructures for Autism Diagnosis. *IFAC-Pap.* 53: 446-451.

Zhao, F., Chen, Z., Rekik, I., Lee, S.W., and Shen, D. (2020a). Diagnosis of Autism Spectrum Disorder Using Central-Moment Features From Low- and High-Order Dynamic Resting-State Functional Connectivity Networks. *Front Neurosci* 14: 258.

Zhao, F., Zhang, H., Rekik, I., An, Z., and Shen, D. (2018a). Diagnosis of Autism Spectrum Disorders Using Multi-Level High-Order Functional Networks Derived From Resting-State Functional MRI. *Front Hum Neurosci* 12: 184.

Zhao, J., Song, J., Li, X., and Kang, J. (2020b). A study on EEG feature extraction and classification in autistic children based on singular spectrum analysis method. *Brain Behav* 10: 1721.

Zhao, Y., Ge, F., Zhang, S., and Liu, T. (2018b). 3D Deep Convolutional Neural Network Revealed the Value of Brain Network Overlap in Differentiating Autism Spectrum Disorder from Healthy Controls. *Medical Image Computing and Computer Assisted Intervention – MICCAI 2018*: 172-180.

Zhao, Z., Tang, H., Zhang, X., Qu, X., Hu, X., and Lu, J. (2021). Classification of Children With Autism and Typical Development Using Eye-Tracking Data From Face-to-Face Conversations: Machine Learning Model Development and Performance Evaluation. *J Med Internet Res* 23: 29328.

Zhao, Z., Zhang, X., Li, W., Hu, X., Qu, X., Cao, X., Liu, Y., and Lu, J. (2019). Applying Machine Learning to Identify Autism With Restricted Kinematic Features. *IEEE Access* 7: 157614-157622.

Zhao, Z., Zhu, Z., Zhang, X., Tang, H., Xing, J., Hu, X., Lu, J., and Qu, X. (2022). Identifying Autism with Head Movement Features by Implementing Machine Learning Algorithms. *J Autism Dev Disord* 52: 3038-3049.

Zhou, Y., Yu, F., and Duong, T. (2014). Multiparametric MRI characterization and prediction in autism spectrum disorder using graph theory and machine learning. *PLoS One* 9: 90405.

Zhuang, J., Dvornek, N.C., Li, X., Ventola, P., and Duncan, J.S. (2019). Invertible Network for Classification and Biomarker Selection for ASD. Springer, *International Conference on Medical Image Computing and Computer-Assisted Intervention*: 700-708.

Zu, C., Gao, Y., Munsell, B., Kim, M., Peng, Z., Cohen, J.R., Zhang, D., and Wu, G. (2019). Identifying disease-related subnetwork connectome biomarkers by sparse hypergraph learning. *Brain Imaging Behav* 13: 879-892.
